# Supplementary material for: Maastrichtian-Rupelian paleoclimates in the southwest Pacific – a critical evaluation of biomarker paleothermometry and dinoflagellate cyst paleoecology at Ocean Drilling Program Site 1172
Source: Copernicus journal article supplement (doi:10.5194/cp-2021-18), 2021-03-11
Supplement: Supplementary file 1 [file cp-2021-18-supplement-version4.zip]

## Sheet: 1172
type	event	reversal	depth (rmbsf)	age (GTS2012)
N	T	Chiasmolithus altus	349.235	25.42
m	T	C11n.2n	357.3	29.53
m	O	C11n.2n	358.6	29.97
m	T	C13n	358.8	33.16
m	O	C13n	358.9	33.71
m	T	C15n	359.7	34.99
m	O	C15n	359.9	35.29
m	T	C16n.1n	360.1	35.7
m	O	C16n.1n	361.3	35.89
m	T	C16n.2n	361.5	36.05
m	O	C16n.2n	365	36.7
m	T	C17n	367.1	36.97
m	O	C17n	373.9	38.33
m	T	C18n	382.1	38.62
m	O	C18n	421	40.14
m	T	C19n	430	41.15
m	O	C19n	432	41.39
m	T	C20n	444	42.3
m	O	C20n	456	43.43
m	T	C21n	526.4	45.73
m	O	C21n	540	47.35
m	T	C22n	555.9	48.56
m	O	C22n	570	49.34
m	T	C23n	581	50.62
m	O	C23n	585	51.83
m	T	C24n	585.01	52.62
m	O	C24n	594.2	53.98
i	T	PETM	610.8	55.83
i	O	PETM	611.8	56
m	T	C25n	618	57.1
m	O	C25n	621.5	57.66
m	T	C26n	625	58.96
m	O	C26n	634.8	59.24
m	T	C27n	690.01	62.22
m	O	C27n	690.02	62.52
m	T	C28n	692.6	64.38
m	O	C28n	692.87	64.67
m	T	C29n	696.28	64.96
m	O	C29n	698.77	65.69
m	T	C30n	698.78	66.431
m	O	C30n	709.1	68.266
m	T	C31n	713.3	68.379
m	O	C31n	736.6	69.302
