# Supplementary material for: Maastrichtian-Rupelian paleoclimates in the southwest Pacific – a critical evaluation of biomarker paleothermometry and dinoflagellate cyst paleoecology at Ocean Drilling Program Site 1172
Source: Copernicus journal article supplement (doi:10.5194/cp-2021-18), 2021-03-11
Supplement: Supplementary file [file cp-2021-18-RC1-supplement.pdf]

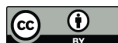

1 **Maastrichtian-Rupelian paleoclimates in the southwest Pacific – a critical**  
2 **evaluation of biomarker paleothermometry and dinoflagellate cyst**  
3 **paleoecology at Ocean Drilling Program Site 1172**

4

5 Peter K. Bijl<sup>1\*</sup>, Joost Frieling<sup>1,2</sup>, Margot J. Cramwinckel<sup>1,3</sup>, Christine Boschman<sup>1</sup>, Appy  
6 Sluijs<sup>1</sup>, Francien Peterse<sup>1</sup>

7

8 <sup>1</sup>Department of Earth Sciences, Utrecht University, Utrecht, the Netherlands.

9 <sup>2</sup>now at: Department of earth Sciences, University of Oxford, South Parks Road OX1  
10 3AN, UK

11 <sup>3</sup>now at: School of Ocean and Earth Science, National Oceanography Centre  
12 Southampton, University of Southampton, Southampton, UK

13

14 \* corresponding author. email: p.k.bijl@uu.nl

15

16 **Abstract**

17 Sea surface temperature (SST) reconstructions based on isoprenoid glycerol dialkyl  
18 glycerol tetraether (isoGDGT) distributions from the Eocene southwest (sw) Pacific  
19 Ocean are unequivocally warmer than can be reconciled with state-of-the-art fully  
20 coupled climate models. However, the SST signal preserved in sedimentary archives  
21 can be affected by contributions of additional isoGDGT sources. Methods now exist to  
22 identify and possibly correct for overprinting effects on the isoGDGT distribution in  
23 marine sediments. We here use the current proxy insights to assess the reliability of  
24 the isoGDGT-based SST signal in 69 newly analysed and 242 re-analysed sediments  
25 ODP Site 1172 (East Tasman Plateau, Australia) following state-of-the-art  
26 chromatographic techniques, in context of paleo-environmental and  
27 paleoclimatologic reconstructions based on dinoflagellate cysts. The resulting ~130  
28 kyr-resolution Maastrichtian-Oligocene TEX<sub>86</sub>-based SST record confirms previous  
29 conclusions of anomalous warmth in the early Eocene sw Pacific and remarkably cool  
30 conditions during the mid-Paleocene. Dinocyst diversity and assemblages show a  
31 strong response to the local SST evolution, supporting the robustness of the TEX<sub>86</sub>  
32 record.



33 Soil-derived branched GDGTs stored in the same sediments are used to reconstruct  
34 mean annual air temperature (MAAT) of the nearby land using the  $MBT'_{5me}$  proxy.  
35 MAAT is consistently lower than SST during the early Eocene, independent of the  
36 calibration chosen. General trends in SST and MAAT are similar, except for: 1) an  
37 enigmatic absence of MAAT rise during the Paleocene-Eocene Thermal Maximum and  
38 Middle Eocene Climatic Optimum, and 2) a subdued middle-late Eocene MAAT  
39 cooling relative to SST. Both dinocysts and GDGT signals suggest a mid-shelf  
40 depositional environment with strong river-runoff during the Paleocene-early  
41 Eocene, progressively becoming more marine thereafter. This trend reflects gradual  
42 drying and more pronounced wet/dry seasons in the northward drifting Australian  
43 hinterland, which may also explain the subdued middle Eocene MAAT cooling relative  
44 to that of SST. The overall correlation between dinocyst assemblages, marine  
45 biodiversity and SST changes suggests that temperature exerted a strong influence on  
46 the surface-water ecosystem, probably in part through sea level changes caused by  
47 steric effects. Finally, we find support for a potential temperature control on  
48 compositional changes of branched glycerol monoalkyl glycerol tetraethers  
49 (brGMGTs) in marine sediments. It is encouraging that a critical evaluation of the  
50 GDGT signals confirms the vast majority of the generated data is reliable. However,  
51 this also implies the high  $TEX_{86}$ -based SSTs for the Eocene <sup>sw</sup>Pacific, and the  
52 systematic offset between absolute  $TEX_{86}$ -based SST and  $MBT'_{5me}$ -based MAAT  
53 estimates remain unexplained.  
54

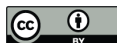

## 55 1. Introduction

### 56 1.1 The Paleogene Southwest Pacific Ocean

57 Reconstructions of deep-sea (Westerhold et al., 2020) and sea surface  
58 temperature (Bijl et al., 2009; 2013a; Cramwinckel et al., 2018; Frieling et al., 2014;  
59 Hollis et al., 2014; 2019; Inglis et al., 2015; 2020; O'Brien et al., 2017; Evans et al.,  
60 2018; O'Connor et al., 2019; Sluijs et al., 2020) have revealed overall cool climate in  
61 the Maastrichtian and Paleocene, long-term warming towards the early Eocene  
62 Climatic Optimum (EECO; 53.4 – 49.2 Ma), and subsequent cooling during the middle  
63 and late Eocene (48.6 – 33.6 Ma). The EECO stands out as particularly warm, with ice-  
64 free polar regions (Bijl et al., 2013a; Hines et al., 2017; Pross et al., 2012; Frieling et  
65 al., 2014). Certain southern high-latitude regions retain warm-temperate conditions  
66 into the late Eocene (Bijl et al., 2009; Houben et al., 2019) and, despite ample  
67 evidence for pronounced Antarctic glacial expansion across the Eocene-Oligocene  
68 transition (Salamy and Zachos, 1999; Bohaty et al., 2012), even into the early  
69 Oligocene (Hartman et al., 2018; Passchier et al., 2013; 2017; O'Brien et al., 2020).  
70 Variations in atmospheric CO<sub>2</sub> concentrations (Beerling and Royer, 2011; Anagnostou  
71 et al., 2016; Foster et al., 2017) are likely the primary driver of these multi-million-  
72 year climatic trends (Cramwinckel et al., 2018). While equatorial proxy-based sea  
73 surface temperatures (SSTs) and deep-sea temperatures, assumed to reflect high-  
74 latitude SSTs, show good correspondence with numerical model simulations under  
75 Eocene boundary conditions and with varying CO<sub>2</sub> forcing (Cramwinckel et al., 2018),  
76 proxy-based SST reconstructions of the southwest (sw) Pacific remain warmer than  
77 those from model simulations (Bijl et al., 2009; Cramwinckel et al., 2018; Hollis et al.,  
78 2012; Lunt et al., 2021), despite proposed zonal heterogeneity (Douglas et al., 2014).  
79 Specifically, numerical models are currently unable to simulate a paleoclimate in  
80 which the annual SST difference between the equatorial Atlantic Ocean (Cramwinckel  
81 et al. 2018) and the sw Pacific Ocean (Bijl et al., 2013a; Hollis et al., 2012) is as small  
82 as the proxy data suggests. Without this model-data mismatch resolved, it remains  
83 unclear to what extent numerical models properly simulate polar amplification of  
84 Paleogene climates and if the current proxies properly reflect high-latitude  
85 temperatures under greenhouse conditions (Lunt et al., 2012).



86 **Proxy** evidence for warmth in the Eocene sw Pacific region derives from a  
87 suite of organic and calcite-based proxies. In terms of the latter, oxygen isotope ratios  
88 ( $\delta^{18}\text{O}$ ) and trace element ratios (Mg/Ca) from well-preserved planktonic foraminifera  
89 indicate warm temperatures from Eocene sections in New Zealand (Creech et al.,  
90 **2010**; Hines et al., 2017; Hollis et al., 2009; 2012). These proxies require assumptions  
91 regarding seawater chemistry (Mg/Ca,  $\delta^{18}\text{O}$  seawater, pH) that carry significant  
92 **uncertainty** (e.g., **Kozdon et al., 2020, Evans et al. 2018**). The application of clumped  
93 isotope paleothermometry has great potential to ~~partially alleviate such concerns~~, as  
94 evident from work on Seymour Island (Douglas et al., 2014). Pollen-based vegetation  
95 reconstructions from New Zealand, ~~the Tasman region~~ and Wilkes Land (Carpenter et  
96 al., 2012; Contreras et al., 2013; 2014; Huurdeman et al., 2020; Pross et al., 2012),  
97 however, **confirm** warm conditions, and arguably deliver the best constraints on  
98 winter temperatures. This is because of fundamental physiological restrictions in  
99 ~~their~~ individual tolerances (e.g., Reichgelt et al., 2018), whereas mean annual air  
100 temperature (MAAT) reconstructions from pollen assemblages are complicated  
101 because **MAAT** exerts much less control on the standing vegetation than seasonal  
102 temperature and hydrological extremes. Reconstructions of the warm Eocene  
103 ~~primarily~~ relied on organic geochemical proxies, ~~notably~~  $\text{TEX}_{86}$  (Bijl et al., 2009;  
104 2013a; Cramwinckel et al., 2018; 2020; Crouch et al., 2020; Hollis et al., 2009; 2012;  
105 Sluijs et al., 2006; 2009; 2011). These absolute SST estimates for the sw Pacific are  
106 closer to those from the equatorial Atlantic ~~as~~ they are to the deep-sea (Cramwinckel  
107 et al., 2018), which is surprising given that the South Pacific ~~was presumably the~~  
108 dominant region of deep-water formation during the Eocene (Huber and Thomas,  
109 2010; Thomas et al., 2003; 2014).

110

#### 111 1.2 GDGT paleothermometry

112  $\text{TEX}_{86}$  utilizes the correspondence of higher ~~abundances~~ of cyclopentane rings  
113 in sedimentary archaeal membrane lipids ~~termed~~ isoprenoid glycerol dialkyl glycerol  
114 tetraethers (isoGDGTs) with higher SST ~~of the overlying surface water~~ (Schouten et  
115 al., 2002). This relation is attributed to a viscoelastic adaptation of the membrane of  
116 pelagic Thaumarchaeota, the dominant source organisms of isoGDGTs, to temperature  
117 (Schouten et al., 2002; 2013). For some periods in geological deep time, including the



118 Paleocene and Eocene, TEX<sub>86</sub> calibrations based on GDGTs in core top sediments need  
119 to be extrapolated above the modern SST range (~30°C) to estimate SST. The  
120 ~~linearity of the relation at and beyond the high end of the core top calibration is~~  
121 poorly known, ~~leading to very high uncertainty in SST estimates at the warm end of~~  
122 ~~the calibration~~ (Hollis et al., 2019). However, as the absolute TEX<sub>86</sub> values of many  
123 Eocene sediments exceed those observed for modern core-tops, even the most  
124 conservative calibrations yield SSTs >30°C in the warmest intervals. Increasingly,  
125 such temperatures are corroborated by estimates from other SST proxies (e.g., Zachos  
126 et al, 2006; Frieling et al., 2017; Evans et al., 2018).

127 Along with calibration uncertainties, a number of confounding factors have  
128 been identified since first publication of the isoGDGT-based SST records from the sw  
129 Pacific (Hollis et al., 2009; 2012; Bijl et al., 2009; 2013), relating to a suite of pre-, syn-  
130 , and post-depositional processes that might alter the pelagic isoGDGT signal in  
131 marine sediments. IsoGDGT contributions from methanogenic (Blaga et al., 2009) and  
132 methanotrophic (Weijers et al., 2011; Zhang et al., 2011) archaea, deep-dwelling  
133 archaea (Taylor et al., 2013) and terrestrial sources (Hopmans et al., 2004; Weijers et  
134 al., 2006) ~~to the sedimentary isoGDGT pool have been determined. These factors can~~  
135 ~~be recognized in GDGT distributions, leading to better interpretation of TEX<sub>86</sub> based~~  
136 ~~SST reconstructions.~~ However, the influence of growth phase (Elling et al., 2014), and  
137 environmental ammonium and oxygen concentrations (Qin et al., 2015; Hurley et al.,  
138 2016) on sedimentary isoGDGT distributions are as yet poorly constrained.

139 Branched GDGTs (brGDGTs) produced by soil bacteria provide  
140 reconstructions of mean annual air temperature (MAAT) using the MBT<sub>5me</sub> index (De  
141 Jonge et al., 2014a; Naafs et al., 2019; Peterse et al., 2012; Weijers et al., 2007; Dearing  
142 Crampton-Flood et al., 2020). Based on brGDGTs supplied to marine sediments, the  
143 MAAT evolution of ~~Australian-New Zealand continents~~ followed the trends in deep-  
144 and surface ocean temperature remarkably well, but with much lower absolute  
145 values than SST (Bijl et al., 2013a; Pancost et al., 2013). Albeit to a lesser extent than  
146 SST, southern high-latitude MAAT reconstructions remain warmer than model  
147 simulations (Huber and Caballero, 2011) as well, even when simulations replicate  
148 equatorial surface and global deep ocean temperatures (Cramwinckel et al., 2018).  
149 With improved analytical techniques (Hopmans et al., 2016), brGDGT isomers with a



150 methylation on the 5- or the 6-position of the alkyl chain can now be separated and  
151 quantified (De Jonge et al., 2013). With this separation, the pH co-dependence of the  
152 brGDGT signal can be removed, isolating the temperature relation (De Jonge et al.,  
153 2014a; Naafs et al., 2017a). The separation of brGDGT isomers also allows **to**  
154 **recognize** ~~and correct~~ for potential contributions of aquatic brGDGTs to the soil-  
155 derived brGDGT signal stored in marine sediments that complicate the use of  
156 brGDGTs as continental paleothermometer in continental margin sediments (De  
157 Jonge et al., 2014b; 2015; Dearing Crampton-Flood et al., 2018; Peterse et al., 2009;  
158 Sinninghe Damsté, 2016; Tierney and Russell, 2009; Zell et al., 2013).

159 Lipids from a related biomarker family, the branched glycerol monoalkyl  
160 glycerol tetraethers (brGMGTs), were identified in the marine realm in core-top  
161 sediments (Liu et al., 2012), oxygen minimum zones (Xie et al. 2014), and later in peat  
162 (Naafs et al 2018a) and East African lake sediments (Baxter et al 2019), the latter  
163 identifying 7 individual brGMGTs. The brGMGTs contain a covalent bond connecting  
164 the two alkyl chains. The abundance of brGMGTs relative to that of brGDGTs, as well  
165 as the relative distribution of brGMGT isomers seems to vary with temperature in  
166 some degree (Baxter et al., 2019; Naafs et al., 2018a; Tang et al., 2021), although this  
167 is thus far only based on empirical relationships. The exact sources of these  
168 compounds, and consistency of such signals in various terrestrial, lacustrine and  
169 marine realms, are as yet not fully understood. The degree of methylation of a specific  
170 subset of brGMGT compounds (Naafs et al., 2018a, Sluijs et al. 2020) is however  
171 similar to those in brGDGTs for which membrane stability regulation is proposed as  
172 underlying mechanism (Weijers et al., 2007). Paleogene marine sediments from the  
173 Arctic Ocean ~~do~~ contain abundant brGMGTs (Sluijs et al., 2020), ~~and~~ these seem to be  
174 produced in the marine system with a strong oxygen minimum zone, and substantial  
175 terrestrial input. While the degree of methylation of acyclic brGMGTs (HMBT<sub>acyclic</sub>)  
176 ~~does show~~ similar trends to TEX<sub>86</sub> in the Paleogene Arctic record, **brGMGTI**, which  
177 was tentatively calibrated to temperature using a suite of tropical lakes (Baxter et al.,  
178 2019) does not (Sluijs et al., 2020). The response of brGMGTs to environmental and  
179 climatic changes, as well as their sourcing in the marine realm, is clearly diverse,  
180 complex and, as yet, poorly understood.

181



182 1.3 Revisiting GDGTs, and investigating GMGTs at Site 1172

183 From the new insights about the GDGT-based proxies, it is clear that assessing  
184 the reliability of previously published GDGT-based temperature reconstructions  
185 requires a ~~revisit and a detailed~~ constraints on past environmental, climatological and  
186 depositional conditions. Moreover, the presence and proxy potential of brGMGTs the  
187 early Paleogene sw Pacific has not yet been assessed. To this end, we have revisited a  
188 sedimentary record ~~from the sw Pacific Ocean~~ ODP Site 1172 on the East Tasman  
189 Plateau (ETP), which contains an almost complete succession of late Cretaceous to  
190 early Oligocene sediments (Bijl et al., 2013b; 2014; Brinkhuis et al., 2003;  
191 Schellenberg et al., 2004; Stickley et al., 2004a). We have ~~newly analysed~~ isoGDGTs,  
192 brGDGTs, and brGMGTs from the Maastrichtian and Paleocene section of the record,  
193 and re-analysed previously published sample sets using the chromatography method  
194 with improved compound separation (Hopmans et al., 2016). We critically evaluate  
195 the biomarker results using established indicators for pre-, syn- or post-depositional  
196 overprint of the primary sea surface and air temperature signals. In addition, we use  
197 dinoflagellate cyst assemblages and terrestrial palynomorph abundance as recorders  
198 of paleoenvironmental change on the continental shelf, for constraints on  
199 depositional, environmental and hydrological changes, in order to aid interpretations  
200 of the GDGT indices. We also evaluate the nature, source and possible temperature  
201 affinity of the brGMGTs in our record. After this critical (re-)evaluation, we interpret  
202 the Maastrichtian to early Oligocene sea surface and air temperature, and  
203 paleoenvironmental evolution of the sw Pacific region.





Fig. 1

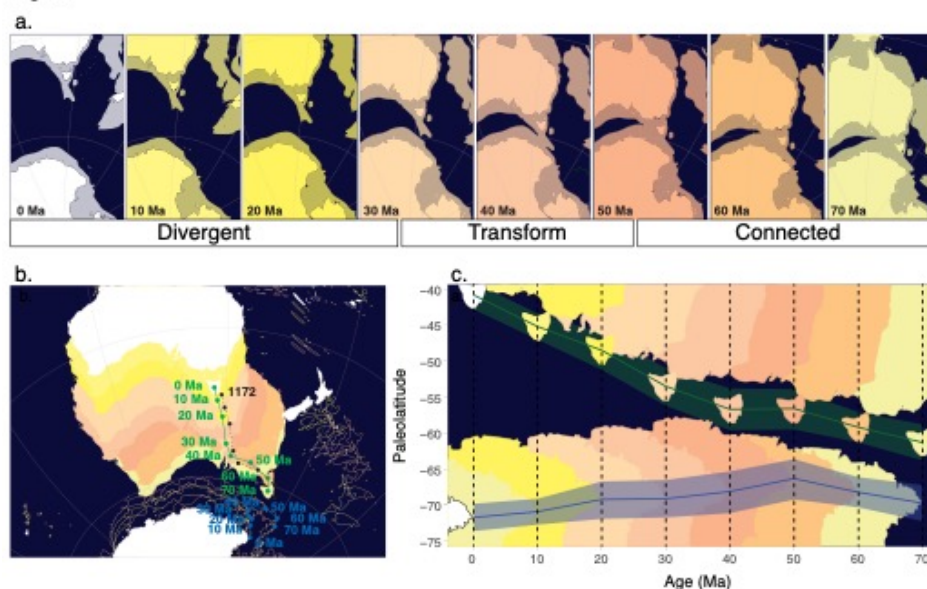

204

205 Figure 1. Absolute plate tectonic changes around Tasmania during the Maastrichtian  
206 to recent. a. TG opening in 8 time slices, from 70 Ma to present. Relative tectonic  
207 motion between Australia and Antarctica is limited until about 53 Ma, transfer until  
208 34 Ma and divergent from 34 Ma onwards. b. Like a, but on an orthographic  
209 projection (compiled with Gplates, using paleomagnetic reference frame (Torsvik et  
210 al., 2012) from Seton et al. (2012)). Green and blue lines and dots represent the  
211 pathways of Tasmania and Cape Adare, respectively, black dashed line and dots  
212 represent the paleo-position of Site 1172. c. The absolute paleolatitude of Cape Adare,  
213 Antarctica (blue line, blue shading = uncertainty), as indicative of the plate tectonic  
214 motion around the pathway of the Tasman Current, and of Tasmania (green line,  
215 green shading = uncertainty), as indicative of the plate tectonic motion of the source  
216 area of the terrestrial organic matter, in 10 Myr time steps from 70–0 Ma. obtained  
217 from paleolatitude.org (Van Hinsbergen et al., 2015). Plate contours represent  
218 paleolatitude of present-day shorelines, for orientation (obtained from Gplates). Note  
219 that in visualizations b and c, submerged continental crust is not shown, but does  
220 limit TG opening.

221

222





## 223 2. Material

### 224 2.1 Site locality and tectonic evolution

225 Since the Cenomanian, the continental complex including Australia, Tasmania,  
226 ETP and the South Tasman Rise (STR) tectonically moved as one continental plate  
227 (Müller et al., 2000) – here referred to as Australia. True polar wander, although  
228 relatively poorly constrained, **has caused** absolute plate motions relative to the spin  
229 axis of the Earth (Torsvik et al., 2012; Van Hinsbergen et al., 2015). On a  
230 paleomagnetic reference frame, Antarctica and Australia rotated northwestward by  
231 3° of latitude and over 3° longitude between 70 and 50 Ma (Fig. 1), with only little  
232 transform displacement between them. From 50 Ma onwards, the tectonic drift  
233 orientation of Antarctica shifted slightly more southwards than that of Australia,  
234 causing left transform motion between notably west of Cape Adare and west  
235 Tasmania (Fig. 1; Williams et al., 2019). Although this divergence effectively opened  
236 the Tasmanian Gateway (TG) to surface flow of the Antarctic Counter Current close to  
237 the early-middle Eocene boundary (Bijl et al., 2013a), probably through subsidence of  
238 the Antarctic continental margin and STR, rapid northward movement of Australia  
239 and southward movement of East Antarctica did not start before about 40 Ma (Fig. 1;  
240 Cande and Stock, 2004; Seton et al., 2012). Yet, a connection between Australian and  
241 Antarctic continental blocks persisted until 34Ma when transform motion between  
242 STR and Wilkes Land changed into spreading and ocean crust formation (Cande and  
243 Stock, 2004; Seton et al., 2012).

244

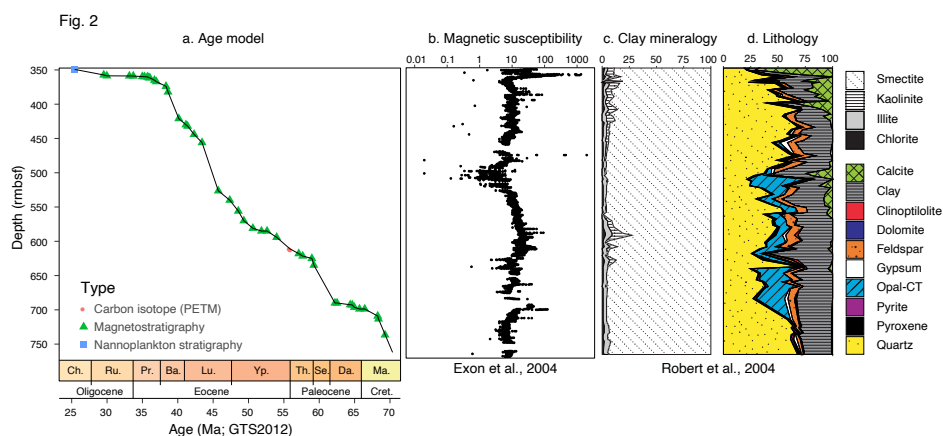

245



246 Figure 2. a. Age tie points used to construct the age model for ODP Site 1172, based on  
247 carbon isotope (Bijl et al., 2010; Sluijs et al., 2011), magnetostratigraphic (Bijl et al.,  
248 2010; Houben et al., 2019; Stickley et al., 2004a), and nannofossil (Houben et al.,  
249 2019) age constraints. b. Shipboard magnetic susceptibility from Exon et al. (2001). c.  
250 Shore-based clay mineralogy and d. smear slide-based lithological observations from  
251 Robert (2004).

252

253

## 254 2.2 Lithology

255 A 760 meter thick sediment sequence was recovered at ODP Site 1172, on the  
256 western part of the ETP, east of Tasmania, Australia (Exon et al., 2001). We studied  
257 the interval from 760 meters below sea floor (mbsf) to about 350 mbsf in a composite  
258 (Röhl et al., 2004a) of Hole A and D. The carbonate ooze from 350 mbsf upwards did  
259 not yield any GDGTs. The studied succession consists broadly of green-grey silty  
260 claystones from 760 to ~505 mbsf, grading into dark grey to black silty claystones  
261 from 636 – 625 mbsf, then a return of the greenish grey silty claystones, which is  
262 interrupted by a more lithified unit at 610 mbsf (Exon et al., 2001; Röhl et al., 2004a,  
263 b; Schellenberg et al., 2004; Sluijs et al., 2011). The silty claystones turn gradually and  
264 cyclically lighter from 570 mbsf upwards until ~361 mbsf, with gradually more  
265 calcium carbonate and diatoms preserved (Röhl et al., 2004a). The clay mineralogy is  
266 dominated by smectite but contains progressively more kaolinite above ~500 mbsf  
267 (Fig. 2; Exon et al., 2001; Robert, 2004). Grey silty claystones give way to a green  
268 glauconitic horizon between 360.1 and 357.3 mbfs (Exon et al., 2001). Above this  
269 greensand, carbonate oozes continue further upwards. The record is quasi-  
270 continuously bioturbated by zoophycos (Exon et al., 2001). We follow the depth  
271 corrections published in (Sluijs et al., 2011) for Cores 12R–31R, based on the  
272 correlation of core-log and downhole log magnetic susceptibility.

273

## 274 2.3 Age model

275 For age tie points (Table S1; Fig. 2), we use the identification of the PETM  
276 (Sluijs et al., 2011) and Middle Eocene Climatic Optimum (MECO; Bijl et al., 2010) and  
277 robust biostratigraphical constraints from the Eocene–Oligocene Boundary interval



278 (Houben et al., 2019; Sluijs et al., 2003). In the intervals ~~in~~ between, the age model  
279 ~~relies~~ on magnetostratigraphy, which ~~in some intervals suffers from a strong normal~~  
280 ~~overprint~~ (Dallanave et al., 2016), calibrated using nannofossil, diatom, and dinocyst  
281 biostratigraphy (Bijl et al., 2013b; Stickley et al., 2004). ~~Despite the~~ overprint, there  
282 does seem to be a paleomagnetic signal preserved in the inclination data (Fuller and  
283 Touchard, 2004), and biostratigraphic constraints are broadly consistent with nearby  
284 sites (Bijl et al., 2013b; Dallanave et al., 2016).

285 The nature of the sediments and depositional setting (see below) implies that  
286 small hiatuses may exist between the age tie points (Röhl et al., 2004a). Indeed,  
287 hiatuses were already identified across the Cretaceous–Paleogene Boundary  
288 (Schellenberg et al., 2004), in the mid-Paleocene (Bijl et al., 2013b; Hollis et al., 2014),  
289 early Eocene (Bijl et al., 2013b) and in the middle Eocene (Röhl et al., 2004a),  
290 corresponding to increases in magnetic susceptibility (Fig. 2). The section across the  
291 Eocene–Oligocene transition is strongly condensed (Houben et al., 2019; Stickley et  
292 al., 2004a, b).

293

#### 294 2.4 Depositional setting

295 From the lithology (Robert, 2004) and palynological content (Brinkhuis et al.,  
296 2003), the Maastrichtian–Eocene part of the record ~~was~~ interpreted to represent a  
297 shallow-marine, mid-continental shelf depositional setting, with gradual deepening in  
298 the middle Eocene based on an increase in calcium carbonate content (Fig. 2; Röhl et  
299 al., 2004a). The late Eocene greensands ~~have been~~ initially interpreted as ~~evidencing~~  
300 ~~strong~~ deepening and current inception as a result of widening of the TG (Stickley et  
301 al., 2004b). Later studies have related the greensands to invigorated ocean circulation  
302 and winnowing (Houben et al., 2019), ~~and not necessarily~~ deepening of the site.

303 Volcanic activity of the Balleny plume in the late Eocene (Hill and Moore, 2001) might  
304 have played a profound role in the bathymetric changes of the ETP, in addition to the  
305 tectonic stresses that act on diverging plates in the TG area.

306 The regional tectonic evolution has implications for interpreting the marine  
307 and terrestrial temperature record at this site, because it influenced regional  
308 oceanography and climatic conditions in the hinterland ~~catchment area~~. Field data  
309 and model simulations indicate that with a closed TG, the Tasman Current, a strong



310 western boundary current of the proto-Ross gyre, bathed the plateau with **Antarctic-**  
311 **derived surface waters** (Bijl et al., 2011; 2013b; Huber et al., 2004; Sijp et al., 2014;  
312 2016). Palynological evidence confirms that the Proto-Ross Gyre influence persisted  
313 at the ETP until the late Eocene (Bijl et al., 2011; Warnaar et al., 2009). This means  
314 that despite northward tectonic drift, the same strong western boundary current  
315 bathed the site during the Maastrichtian to early Eocene (Sijp et al., 2016), with  
316 perhaps some intermittent influence of East Australian Current waters from the north  
317 (Bijl et al., 2010; Cramwinckel et al., 2020). This ended when the proto-Leeuwin  
318 Current started to flow through the progressively widening TG (Fig. 1), bringing the  
319 ETP under the influence of more northerly sourced surface waters (Houben et al.,  
320 2019; Stickley et al., 2004b).

321         The source area for the terrestrial organic matter (OM) and detrital input was  
322 likely Tasmania. Persistent terrigenous input (Brinkhuis et al., 2003) arguably  
323 requires a large terrestrial catchment area, and the ETP seems too small (~50,000  
324 km<sup>2</sup>) to have had vast areas above sea level. Moreover, Paleocene–Eocene terrestrial  
325 palynomorph assemblages contain common Permian–Triassic elements (Contreras et  
326 al., 2014); the Permian–Triassic upper Parmeener group contains thick terrestrial  
327 (coal) deposits and comprises the surface lithology of most of eastern Tasmania  
328 today. Although that same formation might be present in the ETP subsurface as well,  
329 it was probably covered with sediment throughout the Cenozoic (Hill and Moore,  
330 2001). Rivers flowing from southeast Australia drained into the Gippsland and Bass  
331 Basins, and that terrigenous material is unlikely to have reached the ETP. Seismic  
332 information from the East Tasman Saddle, connecting the Tasmanian Margin to the  
333 ETP, does not suggest there was a deep basin in between (Hill and Exon, 2004).  
334 Therefore, Tasmanian-sourced detrital material could reach the ETP. The ETP was  
335 close enough to the Antarctic margin during the Maastrichtian–early Eocene to have  
336 received perhaps a minor component of Antarctic-sourced terrestrial OM input, in  
337 addition to the dominant Tasmanian source. The regional palynology (Macphail,  
338 2000; 2002; Carpenter et al., 2012; Pross et al., 2012; Contreras et al., 2013; 2014;  
339 Truswell, 1997), the abundance of peatlands (Holdgate et al., 2009), and the felsic  
340 lithology (Moore, Betts, and Hall, 2013) suggests the hinterland catchment contained  
341 acidic, wet soils and peats.



342

343           2.5 Samples

344           For this study, we used lipid extracts that have been analysed for GDGTs  
345 previously (Bijl et al., 2009; Hollis et al., 2014; Houben et al., 2019; Sluijs et al., 2011).  
346 We augmented these with 69 new extracts of sediments from the Maastrichtian and  
347 the Paleocene, to extend and improve the temporal resolution of the record.  
348 Unfortunately, not all archived samples from the PETM interval (Sluijs et al., 2011)  
349 could be located, and the interval was reanalysed in a lower resolution (6 samples  
350 over the PETM interval). For the remaining PETM, we used the published peak areas  
351 (Sluijs et al., 2011) to calculate  $\text{TEX}_{86}$ , which is warranted given the new analytical  
352 technique does not affect isoGDGT peak area ratios (Hopmans et al., 2016). For  
353 palynology, we collated and revisited data presented in (Bijl et al., 2010; 2013b;  
354 Brinkhuis et al., 2003; Houben et al., 2019; Sluijs et al., 2011) and generated higher-  
355 resolution data for the Maastrichtian and Paleocene.

356

### 357 **3. Methods**

358

#### 359           3.1 Organic geochemistry

##### 360                   3.1.1 Extraction, column separation and analysis

361           Earlier work (Bijl et al., 2009; 2010; 2013a; Houben et al., 2019; Sluijs et al.,  
362 2011) presented in detail the extraction,  $\text{Al}_2\text{O}_3$  column separation and filtering  
363 techniques used for the samples. We followed the same procedures for the processing  
364 of the new samples. We reanalysed all available polar fractions using the double  
365 column UHPLC-MS approach as described in (Hopmans et al., 2016). In short,  
366 processing involved extraction with a Dionex accelerated solvent extractor using  
367 dichloromethane:methanol (DCM:MeOH) 9:1 (v/v), column separation of the total  
368 lipid extract using solvent mixtures hexane:DCM 9:1 (v/v), hexane:DCM 1:1 (v/v) and  
369 DCM:MeOH 1:1 (v/v) for apolar, ketone and polar fractions, respectively. Polar  
370 fractions were filtered using a 0.45  $\mu\text{m}$  polytetrafluorethylene filter, and analysed  
371 using an Agilent 1260 Infinity series HPLC system coupled to an Agilent 6130 single-  
372 quadrupole mass spectrometer.

373

##### 373                   3.1.2 Data analysis: indices, overprints



374 Since the discovery of isoGDGTs as proxy for SST (see Schouten et al. (2013)  
 375 for a review), several non-SST effects have been identified that may affect the  
 376 distribution of isoGDGTs in the sediment. Several indices have been developed to  
 377 identify most of the known sources of overprints (Table 1). ~~Next to signalling SST-~~  
 378 ~~unrelated influences on the isoGDGT pool, these indices also provide information on~~  
 379 ~~the prevailing marine and paleoenvironmental and depositional conditions.~~

380

381 Table 1: Indices from iso- and brGDGTs and brGMGTs. For the ~~chemical structure~~ of  
 382 these components see Fig. 3.

| Index name              | Equation                                                                       | Proxy for                                       | Cut-off value        | Source                   |
|-------------------------|--------------------------------------------------------------------------------|-------------------------------------------------|----------------------|--------------------------|
| TEX <sub>86</sub>       | $\frac{GDGT2 + GDGT3 + Cren'}{GDGT1 + GDGT2 + GDGT3 + Cren'}$                  | Sea surface temperature                         | -                    | (Schouten et al., 2002)  |
| BIT index               | $\frac{IIIa + IIIa' + IIa + IIa' + Ia}{Cren + IIIa + IIIa' + IIa + IIa' + Ia}$ | Terrestrial input                               | >0.4? Site-dependent | (Hopmans et al., 2004)   |
| fcren'                  | $\frac{\%Cren'}{\%Cren' + \%Cren}$                                             | Non-thermal contribution of crenarchaeol isomer | 0.25                 | (O'Brien et al., 2017)   |
| Methane Index           | $\frac{GDGT1 + GDGT2 + GDGT3}{GDGT1 + GDGT2 + GDGT3 + Cren + Cren'}$           | Contribution by methane-metabolising archaea    | >0.3                 | (Zhang et al., 2011)     |
| AOM ratio               | $GDGT2/Cren$                                                                   | Contribution by anaerobic methane oxidizers     | >0.2                 | (Weijers et al., 2011)   |
| GDGT2/3 ratio           | $GDGT2/GDGT3$                                                                  | Contribution by deep-dwelling archaea           | >5                   | (Taylor et al., 2013)    |
| Methanogenesis          | $GDGT0/Cren$                                                                   | Contribution by methanogenic archaea            | >2.0                 | (Blaga et al., 2009)     |
| Ring index (RI)         | $0*\%GDGT0 + 1*\%GDGT1 + 2*\%GDGT2 + 3*\%GDGT3 + 4*\%Cren + 4*\%Cren'$         | Non-pelagic GDGT composition                    | $\Delta RI > 0.3^*$  | (Zhang et al., 2016)     |
| MBT <sub>5me</sub>      | $\frac{IIIa + IIIb + IIIc}{IIIa + IIIb + IIIc + IIa + IIb + IIc + Ia}$         | Mean annual air temperature                     | -                    | (De Jonge et al., 2014a) |
| CBT'                    | $\frac{IIIb + IIb' + IIc' + Ia'}{IIIa + IIa + Ia}$                             | (soil-)pH                                       | -                    | (De Jonge et al., 2014a) |
| #rings <sub>Tetra</sub> | $\frac{Ib + 2 * Ic}{Ia + Ib + Ic}$                                             |                                                 | >0.7                 |                          |



|                                  |                                                                                        |                                     |                                 |                                |                                                          |
|----------------------------------|----------------------------------------------------------------------------------------|-------------------------------------|---------------------------------|--------------------------------|----------------------------------------------------------|
| #rings <sub>penta</sub>          | $\frac{IIb + IIb' + 2 * IIc + 2 * IIc'}{IIa + IIa' + IIb + IIb' + IIc + IIc'}$         | Marine in situ<br>brGDGT production | -                               | (Sinninghe<br>Damsté,<br>2016) |                                                          |
| #rings <sub>penta5</sub>         | $\frac{IIb + 2 * IIc}{IIa + IIb + IIc}$                                                |                                     | -                               |                                |                                                          |
| #rings <sub>penta6</sub>         | $\frac{IIb' + 2 * IIc'}{IIa' + IIb' + IIc'}$                                           |                                     | -                               |                                |                                                          |
| IR                               | $\frac{IIa' + IIb' + IIc' + Ia'}{IIa + IIa' + IIb + IIb' + IIc + IIc' + Ia + Ia'}$     | River in situ brGDGT<br>production  | Depends on<br>soil value        | (De Jonge et<br>al., 2014b)    |                                                          |
| IR <sub>hexa</sub>               | $\frac{Ia'}{Ia + Ia'}$                                                                 |                                     | -                               | (Sinninghe<br>Damsté,<br>2016) |                                                          |
| IR <sub>penta</sub>              | $\frac{IIa' + IIb' + IIc'}{IIa + IIa' + IIb + IIb' + IIc + IIc'}$                      |                                     | -                               |                                |                                                          |
| brGMGTI                          | $\frac{H1020c + H1034a + H1034c}{H1020b + H1020c + H1034a + H1034b + H1034c}$          | Temperature,<br>oxygenation?        | In lakes                        | (Baxter et<br>al., 2019)       |                                                          |
| %brGMGT,<br>%brGMGT <sub>a</sub> | $\frac{[brGMGT]}{[brGMGT] + [brGDGT]} \times 100$                                      |                                     | In peats,<br>lakes              |                                | (Baxter et al.,<br>2019)                                 |
| cyclic                           | $\frac{[brGMGT]}{[Ia + IIa + IIIa + brGMGT]} \times 100$                               |                                     |                                 |                                | (Naafs et al.,<br>2018a)                                 |
| HMBT <sub>acyclic</sub> ,<br>all | $\frac{H1020a + H1020b + H1020c}{H1020a + H1020b + H1020c + H1034a + H1034b + H1034c}$ |                                     | In peats                        |                                | (Naafs et al.,<br>2018a)                                 |
| HMBT <sub>acyclic</sub>          | $\frac{H1020c}{H1020c + 1034b + H1048}$                                                |                                     | In Arctic<br>Ocean<br>sediments |                                | Sluijs et al.,<br>2020, sensu<br>Naafs et al.,<br>2018a) |

383 \* Cutoff depends on TEX<sub>86</sub> value.  $\Delta RI = RI_{TEX} - RI$ , where  $RI_{TEX} = -0.77 * TEX_{86} + 3.32 * TEX_{86}^2 + 1.59$

384

Fig. 3

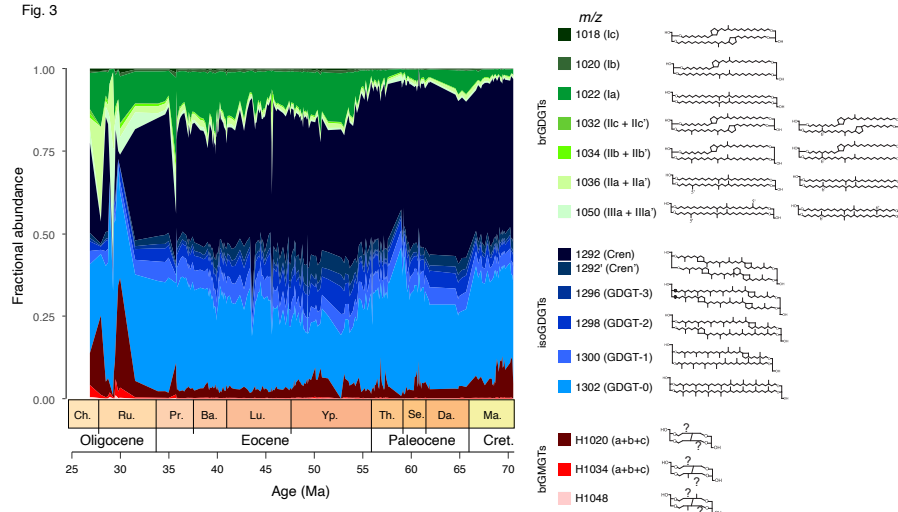

385





386 Figure 3. ~~Fractional abundances~~ of the various branched (green) and isoprenoidal  
387 (blue) GDGTs, and branched GMGTs (red) at ODP Site 1172.

388  
389

390 All of the ratios that signal biases express the influence of this bias relative to  
391 modern “normal” or idealized compositions. The abundance of overprinted  
392 components is divided over either a total sum of overprinted and non-overprinted  
393 components (closed sum; e.g., methane index, IR) or over only the non-overprinted  
394 (ratio; GDGT2/3 ratio, AOM ratio). The complication is that a change in index value  
395 can be caused by changes in the denominator or numerator. This is particularly  
396 evident in the interpretation of the branched and isoprenoid tetraether (BIT) index. It  
397 was proposed that the closed sum ratio between brGDGTs, which were thought to  
398 derive exclusively from soils, and the isoGDGT crenarchaeol, which was thought to be  
399 produced exclusively by marine archaea, could be an indicator for the relative  
400 contribution of soil organic matter (OM) into marine sediments (Hopmans et al.,  
401 2004). However, it was subsequently shown that crenarchaeol, but critically also  
402 other isoGDGTs are produced on land (Weijers et al. (2006), and that a large  
403 contribution of soil-OM to marine sediments can cause a bias in  $TEX_{86}$ . Weijers et al.  
404 (2006) used an end-member model to calculate the potential bias in  $TEX_{86}$ -based SST  
405 reconstructions in the Congo Fan and this shows significant bias ( $>2^{\circ}C$ ) for BIT above  
406 0.3. However, it is rather arbitrary to assign a cut-off for BIT based on the magnitude  
407 of the SST bias alone, as this bias depends primarily on the difference between the  
408 isoGDGT composition of the soil and marine endmembers. As a consequence, there is  
409 no uniform cut-off value for BIT index above which  $TEX_{86}$  should be discarded.  
410 Secondly, because the BIT index is a closed sum, the index is equally affected by  
411 increased production of crenarchaeol as it is by the input of brGDGTs. Although this  
412 could be verified with absolute concentrations of GDGTs, these are not always  
413 presented. Third, brGDGTs are produced in situ in the marine realm (Dearing  
414 Crampton-Flood et al., 2019; Peterse et al., 2009; Sinninghe Damsté, 2016). The  
415 corollary of this is that the cut-off value for BIT to infer an overprint in the isoGDGT-  
416 based SST signal should be assumed to differ per environmental setting, and perhaps  
417 also through time if the setting changes majorly (e.g., Sluijs et al., 2020). As a result,



418 cut-offs were set higher (e.g., 0.4; Bijl et al., 2013a) when no relationship between  
419 TEX<sub>86</sub> and BIT index values was detected. This approach is also not without  
420 complications, because the abundance and composition of isoGDGTs (including  
421 crenarchaeol) in soil material varies (Weijers et al., 2006; De Jonge et al., 2015; De  
422 Jonge et al., 2016; Naafs et al., 2019; Sluijs et al., 2020). This in turn implies that in  
423 samples with high BIT (Weijers et al., 2006), the terrestrially-derived isoGDGT  
424 contribution will not be uniform, and might become impossible to detect in a TEX<sub>86</sub>-  
425 BIT index cross plot. In some paleo-environmental settings that evidently lack high  
426 input of soil-OM, BIT index values are high (Leutert et al., 2020). For reasons given  
427 above, this could either mean very low crenarchaeol production in the marine realm,  
428 or in situ production of brGDGTs. These two scenarios make for a completely  
429 different paleoenvironmental interpretation, and fail to indicate whether the  
430 brGDGTs can be used to reconstruct MAAT of the hinterland or whether isoGDGTs  
431 can be used for reliable paleothermometry. For that, it is important to assess the  
432 sources of brGDGTs, as brGDGTs produced in rivers (De Jonge et al., 2014b; Zell et al.,  
433 2013) or the (coastal) marine environment (Dearing Crampton-Flood et al., 2019;  
434 Peterse et al., 2009; Sinninghe Damsté, 2016) may contribute and thereby bias the  
435 initial soil-derived brGDGT signal, affecting the reliability of MAAT reconstructions.  
436 Fortunately, production of brGDGTs in the marine realm can be recognized based on  
437 the weighed number of rings of the tetramethylated brGDGTs, quantified in the  
438 #ring<sub>tetra</sub>, where values >0.7 indicate a purely marine source of the brGDGTs  
439 (Sinninghe Damsté, 2016). Similarly, brGDGTs that are produced in rivers are  
440 characterized by a relatively high abundance of the 6-methyl brGDGTs relative to the  
441 5-methyl brGDGTs, expressed as the Isomerization Ratio (IR; De Jonge et al., 2014b).

442 For the other overprinting indices, cut-off values may not be as uniformly  
443 applicable to all depositional settings either. Leutert et al. (2020) showed that  
444 modern samples exceeding cut-off values for the GDGT2/3 ratio and methanogenesis  
445 index do not have anomalous TEX<sub>86</sub> index values in the modern core-top dataset  
446 based on the Ring index. This suggests that the TEX<sub>86</sub> index value is not equally  
447 influenced by non-thermal contributions in all depositional settings. As a result,  
448 evaluating non-thermal contributions on TEX<sub>86</sub> index values should consider the  
449 depositional and environmental setting along with the cut-off values.



450

451

### 3.1.3 Calibrations for $\text{TEX}_{86}$ and $\text{MBT}'_{5\text{me}}$

452

453

454

455

456

457

458

459

460

461

462

463

464

465

466

467

468

469

470

471

472

473

474

475

476

477

An extensive number of calibrations has been proposed to convert  $\text{TEX}_{86}$  index values to sea surface temperatures. At the heart of the calibration discussion is the uncertainty whether the  $\text{TEX}_{86}$  to SST relationship continues in a linear way beyond the modern SST range, or in an exponential way (Hollis et al. 2019). The answer to that is beyond the scope of this paper, and we refer to (Cramwinckel et al., 2018; Hollis et al., 2019; O'Brien et al., 2017; Tierney et al., 2017) for detailed discussions, specifically about using  $\text{TEX}_{86}$  in regions with SSTs warmer than modern. Following recent recommendations (Hollis et al. 2019), we here apply several calibrations to convert our  $\text{TEX}_{86}$  values to SSTs. We apply an exponential calibration (Kim et al., 2010) for which we acknowledge that this calibration suffers from a regression dilution bias (Tierney and Tingley, 2015), and two linear calibrations; one on the warm part ( $>15^\circ\text{C}$ ) of the core-top dataset (O'Brien et al., 2017) and one using Bayesian statistics (BAYSPAR; Tierney and Tingley, 2015) to convert our  $\text{TEX}_{86}$  values to SSTs. BAYSPAR produces a linear calibration based on a subset of the core top data with similar GDGT assemblages as the measured  $\text{TEX}_{86}$ , with a user-defined tolerance. The larger the subset of core tops (i.e., when the number of identified core-top analogues to the sample  $\text{TEX}_{86}$  values is large), the closer the Bayesian calibration will approach a global linear regression. For MAAT reconstructions, we use the Deming regression of the soil-specific calibration of Naafs et al. (2017b;  $\text{MAAT}_{\text{soil}}$ ) and the Bayesian Bay $\text{MBT}'_0$  of Dearing Crampton-Flood et al. (2020). The latter follows the approach of BAYSPAR, but then for  $\text{MBT}'_{5\text{me}}$ . We will compare the calibrations for both proxies to middle Eocene  $U^K_{37}$ -based SSTs (from Bijl et al., 2010, but using BAYSPLINE calibration of Tierney and Tingley, 2018) and Paleocene–early Eocene sporomorph-based MAAT estimates (Contreras et al., 2014) from the same site.

Table 2. Calibration equations for  $\text{TEX}_{86}$  and MAAT

| Calibration                                                   | Equation                                   | Type                                    | Proxy for                   | Source             |
|---------------------------------------------------------------|--------------------------------------------|-----------------------------------------|-----------------------------|--------------------|
| $\text{SST}_{\text{exp}}$<br>( $\text{TEX}_{86}^{\text{H}}$ ) | $68.4 * \log_{10}(\text{TEX}_{86}) + 38.6$ | Exponential<br>(regression<br>dilution) | Mean annual SST (0–<br>20m) | (Kim et al., 2010) |



|                      |                                                          |                           |                                                       |                                       |
|----------------------|----------------------------------------------------------|---------------------------|-------------------------------------------------------|---------------------------------------|
| SST <sub>lin</sub>   | 58.8 * TEX <sub>86</sub> - 11.18                         | Linear                    | Mean annual SST (0-20m)                               | (O'Brien et al., 2017)                |
| BAYSPAR              | Prior mean = 20, prior std = 10, search tolerance = 0.15 | Bayesian linear           | Mean annual SST (0-20m)                               | (Tierney and Tingley, 2015)           |
| MAAT <sub>soil</sub> | 40.01 * MBT' <sub>5me</sub> - 15.25                      | Linear, Deming regression | Mean annual air temperature (for days above freezing) | (Naafs et al., 2017b)                 |
| BayMBT <sub>0</sub>  | Prior mean = 20, prior std = 15                          | Bayesian linear           | Mean annual air temperature                           | (Dearing Crampton-Flood et al., 2020) |

478

479

### 3.1.4 R-script for data analysis and evaluation

480

To facilitate systematic calculation of GDGT ratios, data analysis, visualization, and evaluation, we constructed a set of R markdowns

481

(<https://github.com/bijlpeter83/RGDGT.git>) that can be applied to any time- or

482

depth series of isoGDGT, brGDGT and/or brGMGT data. The R script loads peak areas

483

of GDGTs/GMGTS from Microsoft excel spreadsheets, calculates and plots fractional

484

abundances, overprinting indices and paleotemperature time or depth series.

485

486

## 3.2 Palynology

487

### 3.2.1 Sample processing

488

Palynological sample processing techniques were published in the original papers describing these datasets (Bijl et al., 2010; 2013b; Brinkhuis et al., 2003; Houben et al., 2019; Sluijs et al., 2011). We followed the same procedure for the new Maastrichtian–Paleocene samples. The different publications do indicate differences in the employed sieve mesh sizes (10 or 15 µm) but given all counted dinocysts are larger than 15 µm, this has not led to differences in the dinocyst results.

489

### 3.2.2 Taxonomy

490

We used the taxonomic framework cited in Williams et al., (2017) in our counts down to the species level, with one exception. For the Wetzelielloidae subfamily, we follow Bijl et al. (2017), for reasons stated therein. We also follow the supra-generic classification based on Fensome et al. (1993); genera described post-1993 were added into that classification accordingly.

491

### 3.2.3 Ecological affinities of dinocyst ecogroups



502 In this paper, we present our results plotted in eco-groups and complexes,  
 503 which groups dinocyst species with similar ecologic affinities based on modern (for  
 504 extant taxa) and empirical (for extant and extinct taxa) data (Frieling and Sluijs, 2018;  
 505 Sluijs et al., 2005). The species of which the ecologic affinity was not assessed  
 506 previously were included into larger groups based on shared morphological  
 507 characteristics; primarily tabulation, archaeopyle and cyst- and process shapes. For  
 508 example, the "Apectodinium complex" is equated to "Wetzellioids" following Frieling  
 509 et al. (2014; see Table S2 for taxonomic grouping). We directly compare dinocyst- and  
 510 terrestrial palynomorph indices with GDGT-based indices (following the approach of  
 511 Frieling and Sluijs, 2018) to arrive at multi-proxy reconstructions of SST, river runoff  
 512 and distance to shore (Table 3). For this, we resampled and binned GDGT-based  
 513 indices to the sample resolution of the dinocyst data.

514

515 Table 3. Environmental parameters, and their corresponding GDGT indices and  
 516 dinocyst eco-groups, based on Sluijs et al. (2005), Frieling and Sluijs (2018) and Sluijs  
 517 and Brinkhuis (2009).

| Environmental parameter       | GDGT index        | Dinocyst eco-group                                                                                                                                                                                                                                                                            |
|-------------------------------|-------------------|-----------------------------------------------------------------------------------------------------------------------------------------------------------------------------------------------------------------------------------------------------------------------------------------------|
| Sea surface temperature       | TEX <sub>86</sub> | %Thermophiles (Wetzellioideae, <i>Hafniasphaera</i> spp., <i>Florentinia reichartii</i> , <i>Polysphaeridium</i> spp, <i>Homotryblium</i> spp., <i>Heteraulacacysta</i> spp., <i>Eocladopyxis</i> spp., <i>Dinopterygium</i> spp.)                                                            |
| Runoff, fresh water, salinity | IR, BIT           | % <i>Senegalinium</i> cpx, % <i>Phthanoperidinium</i> spp., %Terrestrial palynomorphs                                                                                                                                                                                                         |
| Distance to shore             | BIT, #ringstetra  | %Open marine ( <i>Apectodinium</i> spp., <i>Impagidinium</i> spp., <i>Operculodinium</i> spp., <i>Spiniferites</i> spp.), % <i>Glaphyrocysta</i> cpx., %Epicystal Goniodomids ( <i>Polysphaeridium</i> spp, <i>Homotryblium</i> spp., <i>Heteraulacacysta</i> spp., <i>Eocladopyxis</i> spp., |



|  |  |                                                          |
|--|--|----------------------------------------------------------|
|  |  | <i>Dinopterygium</i> spp.), %Terrestrial<br>palynomorphs |
|--|--|----------------------------------------------------------|

518

519

520

### 3.2.4 Diversity and variability indices

521

522

523

524

525

526

527

528

529

530

531

532

533

534

535

536

537

538

539

540

541

542

543

544

545

546

To gain insight into the diversity and variability of the dinocyst assemblage through time, we employ several indices (Table 4), and compare their results at species and ecogroup level. We note that diversity in dinocyst taxonomy is complicated since dinocysts are dominantly produced during the hypnozygotic phase of the dinoflagellate life cycle following sexual reproduction. Only ~15% of modern dinoflagellates features this cyst stage (Fensome et al., 1993), which leaves a large proportion of the biological group unrepresented in the fossil record, including for example coral and foraminifer symbionts, but also more closely related free-swimming taxa. **Dinocyst diversity can therefore only be used as an indicator for dinocyst-producing dinoflagellates.** As a further complication, taxonomic divisions of cysts, although strongly related to dinoflagellate morphology and taxonomy, is fully based on the morphology of dinocysts. Even modern dinoflagellate-dinocyst relationships are often not unambiguous. Some dinoflagellate species produce various cyst morphologies (Rochon et al., 2008) that represent multiple cyst genera or species. Some of these cyst morphological variations are the result of ecology (Mertens et al., 2011). This complicates comparing cyst datasets on the species level and affects assessing biological diversity based on cysts. On the genus level, taxonomic division of cysts is in most cases based on plate tabulation, which is the morphologic feature that has the closest relationship to dinoflagellate biological diversity (Fensome et al., 1993). However, ecologic or biogeographic affinities have been established for some dinocysts on a species level (e.g., Frieling and Sluijs, 2018), which does suggest subtle morphological features may have biologic and ecologic significance. The eco-groups we use here are the result of extensive reviews of empirical data. These groups combine dinocyst genera and species with fundamentally similar plate tabulations, and thus probably group cysts of closely affiliated biological dinoflagellate species, and, as such also ecologic affinities. For our



547 diversity calculations we use both the ungrouped data on species level and the  
 548 diversity in dinocyst ecogroups.  
 549 As the simplest approximation of biological diversity, the richness  $R$  in terms  
 550 of dinocyst taxa was summed. Furthermore, several diversity measures were  
 551 calculated using the R package Vegan (Oksanen et al., 2015). Of these, Fisher’s alpha  
 552 ( $\alpha$ ) is based on the count data, whereas the Shannon index ( $H'$ ) and Simpson index  
 553 ( $D$ ) derive from the relative abundance data. Finally, we employed the  $\Sigma cv$  metric  
 554 (Gibbs et al., 2012), which we here dub the “Gibbs index”, and which provides a  
 555 measure for assemblage variability. Together, these metrics can give insight into  
 556 changing stability and diversity of these regional dinocyst assemblages over the  
 557 Maastrichtian to early Oligocene.

558

559 Table 4. Diversity and variability indices for (fossil) assemblages. In the Shannon and  
 560 Simpson indices,  $p_i$  represents the proportional abundance of the  $i^{\text{th}}$  taxon of the total  
 561 amount of taxa  $R$ . The Gibbs index summates the coefficients of variation (SD/mean)  
 562 of all taxa ( $i$  to  $R$ ) over a certain rolling window  $t_1 \rightarrow t_2$ . In Fisher’s alpha, the  $\alpha$   
 563 parameter is estimated from the dataset in which  $S$  is the expected number of species  
 564 with an abundance of  $n$ .  $x$  represents a nuisance parameter estimated from the  
 565 dataset, generally between 0.9 and 1. While the Gibbs index is calculated over a  
 566 rolling window, the other indices are calculated per sample.

| Index                       | Equation                                                                                                         | Source                |
|-----------------------------|------------------------------------------------------------------------------------------------------------------|-----------------------|
| Shannon index ( $H'$ )      | $H' = \sum_{i=1}^R p_i * \ln p_i$                                                                                | (Shannon, 1948)       |
| Simpson index ( $D$ )       | $D = \sum_{i=1}^R p_i^2$                                                                                         | (Simpson, 1949)       |
| Gibbs index ( $\Sigma cv$ ) | $\Sigma cv = \sum_{i=1}^R \left( \frac{SD_{i,t_1 \rightarrow t_2}}{\text{mean}_{i,t_1 \rightarrow t_2}} \right)$ | (Gibbs et al., 2012)  |
| Fisher’s alpha ( $\alpha$ ) | $S_n = \frac{\alpha x^n}{n}$                                                                                     | (Fisher et al., 1943) |

567

568 3.3 Comparison of GDGT and dinocyst assemblage data





569 Both dinocyst ecogroups and GDGT indices bear information on SST, runoff  
570 (~salinity), nutrients and marine primary productivity, and relative distance to shore  
571 (Table 4). As dinocyst and GDGT analyses were performed on partly separate  
572 datasets, the highest resolution dataset (dinocysts) was linearly resampled to the  
573 depth intervals of the GDGT data to facilitate inter-comparison.

574

## 575 4. Results

576

### 577 4.1 GDGTs

578 The resulting dataset has an average temporal resolution of ~130 kyrs for the  
579 time interval between 70 and 30 Ma. IsoGDGTs dominate the pool of GDGTs  
580 (particularly GDGT-0 and crenarchaeol), with a gradual increasing relative abundance  
581 of brGDGTs (particularly Ia) throughout the record (Fig. 3). BrGMGTs are in low  
582 (<10%) relative abundance, except in the Oligocene, where they account for up to  
583 30% of the total GDGT/GMGT pool.

#### 584 4.1.1 Isoprenoidal GDGTs

585 Before the  $\text{TEX}_{86}$  index results (Fig. 4a) can be interpreted in terms of SST, we  
586 assess whether the isoGDGTs are primarily derived from the sea surface, or have  
587 received contributions from non-pelagic sources. Across the Ypresian, the BIT index  
588 (Fig. 4b) increases from values around 0.1 in the underlying sediments to values at  
589 times exceeding 0.4. Most EECO and middle Eocene values, however, have BIT index  
590 values between 0.2 and 0.35. The remaining sediments have BIT index values of  
591 around 0.3, with the exception of some upper Eocene and Oligocene sediments that  
592 occasionally have values around 0.75. There is no correlation between  $\text{TEX}_{86}$  and BIT  
593 in our entire dataset ( $p=0.15$ ). None of the samples have  $f_{\text{cren}'}$  (Fig. 4c) values above  
594 the cut-off of 0.25, suggesting no non-temperature related contribution of the  
595 crenarchaeol isomer to the isoGDGTs. In fact, the consistent trend in ( $f_{\text{cren}'}$ ) and the  
596  $\text{TEX}_{86}$  index (Fig. 4) (and  $\text{TEX}_{86}^{\text{L}}$ , not shown) demonstrates the temperature  
597 sensitivity of  $f_{\text{cren}'}$  and confirms that discarding it from the index as was done for the  
598 cold-temperature index  $\text{TEX}_{86}^{\text{L}}$  (Kim et al., 2010) is not justified here. With the  
599 exception of 6 samples in the Oligocene, all samples have methane index values below  
600 the conservative cut-off value of 0.3 (Fig. 4d), although in the early and middle



601 Eocene, methane index values do approach the cut-off. AOM ratio values suggest an  
 602 overprint from anaerobic methane oxidisers in one sample in the early Eocene that  
 603 also has a high BIT index, and 5 samples from the Oligocene where isoGDGTs  
 604 supposedly received a contribution of anaerobic methane oxidisers (Fig. 4e). As a  
 605 result, these samples were discarded for  $TEX_{86}$ .

Fig. 4

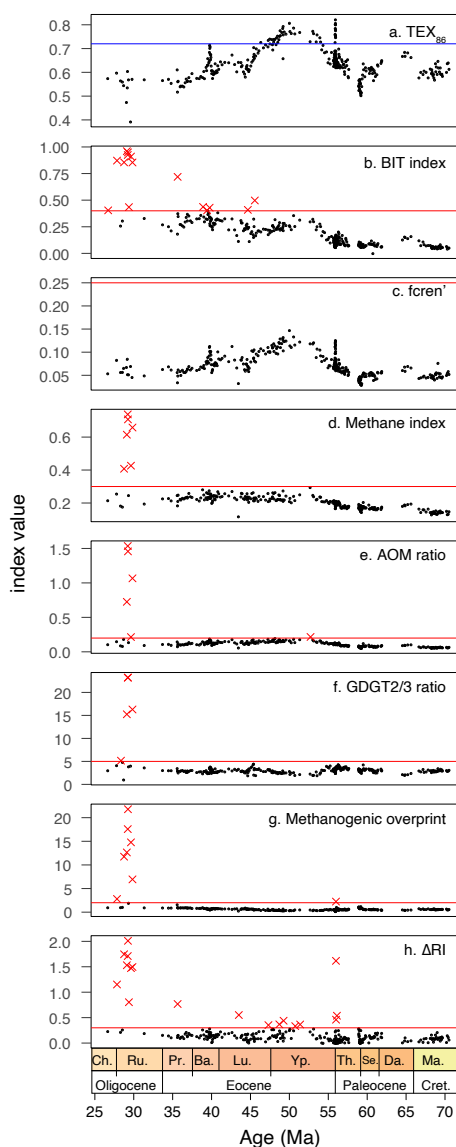

606



607 Figure 4.  $\text{TEX}_{86}$  index and overprinting indices. For the equations of these indices see  
608 Table 1. Red line indicates the cut-off value, red crosses indicate samples exceed the  
609 cutoff a.  $\text{TEX}_{86}$  (Schouten et al., 2002), with blue line indicating the maximum modern  
610 core-top value ( $\sim 0.72$ ). b. BIT index (Hopmans et al., 2004). c.  $\text{fcren}'$  (O'Brien et al.,  
611 2017), no samples discarded; d. Methane index (Zhang et al., 2011),  $n_{\text{discarded}} = 6$ . e.  
612 AOM ratio (Weijers et al., 2011),  $n_{\text{discarded}} = 6$ . f. GDGT2/3 (Taylor et al., 2013),  
613 conservative cut-off of 5,  $n_{\text{discarded}} = 4$ , one sample retained for absence of anomalous  
614 Ring index values (see text). g. Methanogenesis (Blaga et al., 2009), cut-off of 2.0,  
615  $n_{\text{discarded}} = 8$ . h.  $\Delta\text{RI}$   $n_{\text{discarded}} = 18$ .

616  
617  
618

619 Values signalling a deeper water column overprint (GDGT2/3 ratio) fall below  
620 5 for most of the data (Fig. 4f), which was expected given the depositional setting on a  
621 continental shelf. A total of 5 samples has water GDGT2/3 values exceeding 5, 4 of  
622 which also had other indications of overprinted isoGDGT signals. We discard eight  
623  $\text{TEX}_{86}$  datapoints because GDGT-0/crenarchaeol ratios are over 2 (Fig. 4g). One of  
624 these is from the PETM, with a value just above the cut-off. The others represent  
625 Oligocene samples.

626 In total, 18 samples fall outside the range of RI values that characterize  
627 modern pelagic-derived isoGDGT compositions ( $\Delta\text{RI} > 0.3$ ; Fig. 4h, or 95% confidence  
628 interval; Fig. 5). Nine of these 18 come from the interval  $> 43$  Ma and have no other  
629 indications of overprints. These samples fall just outside the 95% confidence interval  
630 limits (Fig. 5) and do follow the overall RI/ $\text{TEX}_{86}$  trend, but we here discard them to  
631 be conservative. The other 9 samples with too high  $\Delta\text{RI}$  come from the late Eocene-  
632 Oligocene and have BIT index values over 0.4. Two of these samples have no other  
633 overprint indication, the other 7 have multiple other overprints. One sample has RI  
634 values above the range of modern samples (with no other overprinting indications),  
635 the others have too low RI values. Eight samples with normal RI values do have  
636 overprints based on the other indices: BIT index values slightly over 0.4 (6 samples),  
637 GDGT2/3 ratio values over 5 (1 sample), and AOM ratio over 0.2 (1 sample).  
638 Following Leutert et al. (2020) we retained the samples with normal RI values and



639 high BIT or GDGT2/3 ratio values. After considering all these potential biases, and  
640 retaining those with normal isoGDGT distributions, we discard a total of 19 samples.  
641 Most discarded samples are from the Oligocene and meet multiple overprint criteria.

Fig.5

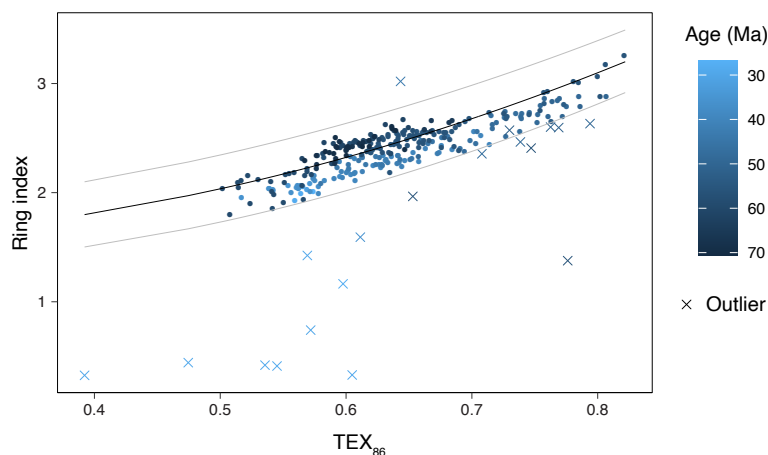

642  
643 Figure 5. Ring index (RI) versus  $TEX_{86}$ . Dots indicate RI/ $TEX_{86}$  values for samples that  
644 are retained, crosses indicate samples that are discarded (see Fig. 4). Color of all  
645 datapoints indicates age of the sample, from Maastrichtian (dark blue) to Oligocene  
646 (light blue). Black and grey curves represent the RI/ $TEX_{86}$  relationship of modern  
647 core top samples, and 95% confidence interval, respectively.

648

649

#### 650 4.1.2 Branched GDGTs

651 Before brGDGT distributions can be interpreted in terms of air temperature,  
652 we assess whether they are primarily derived from soils, or have received  
653 contributions from river-, or marine in situ production. The relative abundance of  
654 tetra-, penta- and hexamethylated brGDGTs in the samples from 1172 deviates from  
655 that in modern and Paleogene soils and peats (Fig. 6): it has either comparatively less  
656 tetra-, less penta-, or more hexamethylated brGDGTs, and the data split into 2  
657 clusters. The largest cluster follows the distribution observed in modern soils and  
658 peats with an offset (Fig. 6). This generally indicates brGDGT contributions from  
659 sources other than soils. The smaller second cluster, containing exclusively mid-to-  
660 late Paleocene samples, is indeed close to that of modern continental shelf sediments



661 (Svalbard and Berau delta; Dearing Crampton-Flood et al., 2019; Sinninghe Damsté,  
662 2016) for which in situ brGDGT production substantially exceeds soil contributions.  
663 This would generally suggest that the smaller cluster, and perhaps also the larger  
664 cluster of samples, have contributions from marine in-situ brGDGT production.  
665 However, unlike those modern marine sediments, our entire record does not show  
666 elevated #rings<sub>tetra</sub> values that are associated to marine *in situ*-produced brGDGTs  
667 (Fig. 7). The low #rings<sub>tetra</sub> values on our record (<0.3) suggest brGDGTs have a  
668 terrestrial source.  
669

Fig. 6

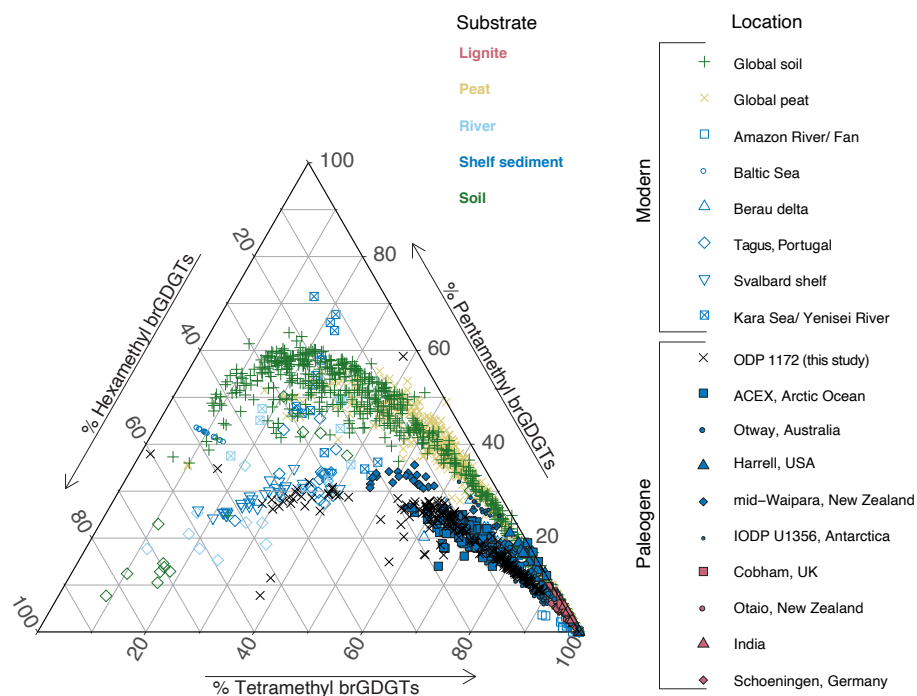

670  
671 **Figure 6.** Ternary diagram showing fractional abundance of tetra-, penta- and  
672 hexamethylated brGDGTs from modern soils (Dearing Crampton-Flood et al., 2020),  
673 peats (Naafs et al., 2017b), rivers (Tagus River, Portugal (Warden et al., 2016) and  
674 Yenisei River (De Jonge et al., 2015)) and marine sediments (Kara Sea (De Jonge et al.,  
675 2015), Svalbard (Dearing Crampton-Flood et al., 2019), Berau delta (Sinninghe  
676 Damsté, 2016), Portugal (Warden et al., 2016), Baltic Sea (Warden et al., 2018), and



677 Amazon Fan (Zell et al., 2014)), Paleogene lignites (Cobham, Schoeningen, India and  
678 Otaio (Naafs et al., 2018b)) and Paleogene marine sediments (Arctic Ocean, IODP  
679 Arctic Coring Expedition ACEX (Willard et al., 2019), Otway Basin, Australia  
680 (Huurdeeman et al., 2020), Gulf of Mexico coastal plain, Harrel core (Sluijs et al., 2014),  
681 New Zealand (Pancost et al., 2013) and Antarctic Margin IODP Site U1356 (Bijl et al.,  
682 2013a)). Data from ODP Site 1172 in black crosses.

Fig.7

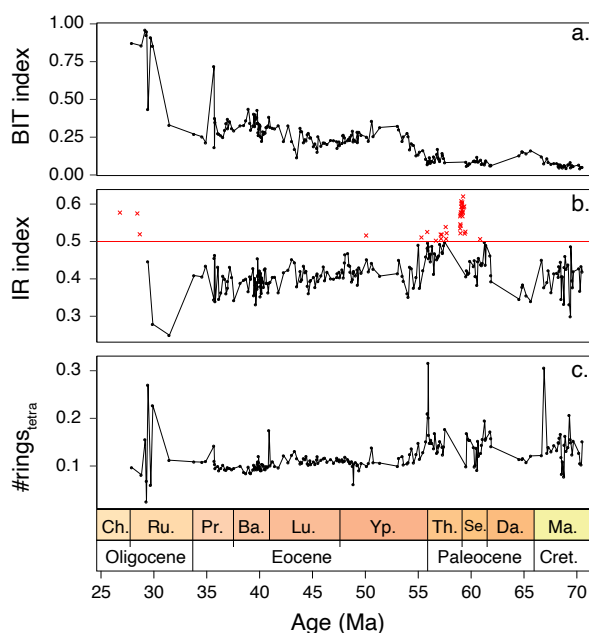

683

684

685 Figure 7. a. BIT index, b. IR (with cut-off value of the Australian soil IR of 0.5 and  
686 discarded MAAT samples in red crosses) and c. #rings<sub>tetra</sub> from Site 1172.

687

688 In the modern soil- and peat brGDGT dataset #rings<sub>penta</sub> and #rings<sub>tetra</sub> are  
689 below 0.7 and follow a coherent 1:1 correlation (Fig. 8a). Values >0.7 suggest  
690 brGDGTs cannot come purely from soils (Sinninghe Damsté 2016). All samples from  
691 1172 are below 0.7 for both these indices, which suggests a terrestrial origin is likely,  
692 and a strong contribution by marine in situ produced brGDGT is unlikely. We do note  
693 that while #rings<sub>tetra</sub> is below 0.3, #rings<sub>penta</sub> ranges up to 0.6. This diverts from the



694 1:1 line but brings the brGDGT dataset from Site 1172 within the area of other  
695 Paleogene marine brGDGT datasets (Fig. 8a). This is consistent with the relative  
696 abundances of tetra-, penta- and hexamethylated brGDGTs plotted in the ternary  
697 diagram, where all Paleogene data plotted offset to that in modern soils. #rings<sub>tetra</sub>  
698 and #rings<sub>penta</sub> for the 5- (Fig. 8b) and 6-methyl brGDGTs (Fig. 8c) separately shows  
699 that the diversion of the 1172 data from modern soils and peats is primarily caused  
700 by a larger degree of cyclisation of the 6-methyl brGDGTs, suggesting an influence by  
701 river brGDGT production.

702 The samples within the Paleocene cluster do have relatively high IR. The IR in  
703 our record averages ~0.4, but is elevated between 62 Ma and 54 Ma, with peak values  
704 in the mid-Paleocene up to 0.6 (Fig. 7). Although based on only two datapoints,  
705 modern southeast Australian soils have IR values of maximum 0.5 (De Jonge et al.,  
706 2014a). Hence, any values exceeding that of the corresponding hinterland soils could  
707 indicate a contribution by non-soil sources (be it marine or river in situ production;  
708 De Jonge et al., 2014a). Given that #rings indices values argue against a large  
709 contribution from marine in-situ production, we suggest that river-produced  
710 brGDGTs contribute to the GDGT pool in the Paleocene samples with high IR.

711 Therefore, for MBT'<sub>5me</sub> calculation, we eliminate all brGDGT samples in our record  
712 that have IR values above that of Australian soils. The IR<sub>penta</sub> and IR<sub>hexa</sub> are well within  
713 the range of the modern soil and peat data (Fig. 8d) and settings affected by marine or  
714 river in situ production (Svalbard, Kara / Yenisei), and plot far away from lignite  
715 deposits.

716



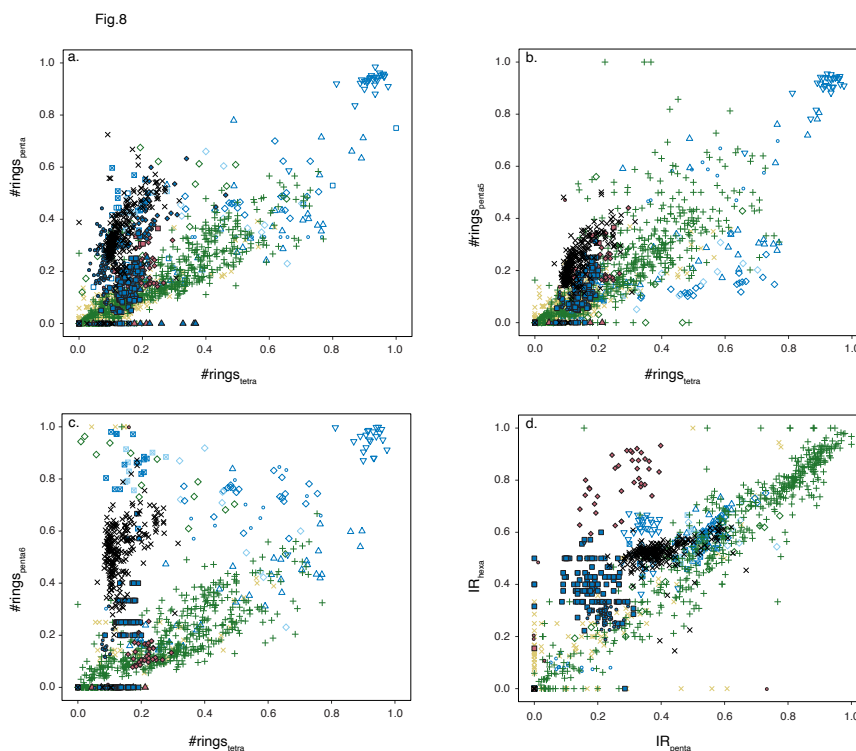

717

718 Figure 8. Crossplots of various brGDGT indices. a.  $\#rings_{tetra}$  vs.  $\#rings_{penta}$ ,  $\#rings_{tetra}$   
719 vs.  $\#rings_{penta5}$ ,  $\#rings_{tetra}$  vs.  $\#rings_{penta6}$ ,  $IR_{penta}$  vs.  $IR_{hexa}$ . For color and symbol legend  
720 see Figure 6.

721

722 The consistent offset in brGDGT composition in Paleogene marine sediments  
723 relative to modern soils can potentially be explained by non-soil contributions even  
724 though many (most) indices suggest soil-dominated sourcing. Notably, not only  
725 Paleogene marine sediments from Site 1172 are offset from present-day soils, but this  
726 extends to other sites as well, including Paleogene lignites that are not influenced by  
727 marine contributions. We thus argue that there may be an additional evolutionary- or  
728 bacterial community factor that is at least in part responsible for the observed offset  
729 brGDGT distributions during the Paleogene, and argue that, with some exceptions,  
730 where indices do suggest non-soil contributions, Paleogene marine sediments contain  
731 a dominant soil-derived brGDGT signal in spite of their offset composition.

732



733

734 4.2 SST and MAAT reconstructions

735 4.2.1 SST

736 By removing all samples with potential overprint from the record we can now  
737 assess the trends in TEX<sub>86</sub>-based SST (Fig. 9a). Reconstructed SSTs differ ~~to~~ up to 4 °C  
738 between the exponential SST<sub>exp</sub> and the linear SST<sub>lin</sub> calibration in the warmest  
739 intervals, and progressively less with lower SSTs (Fig. 9a). The BAYSPAR method,  
740 which uses a linear relation between SST and **TEX86** ~~generates~~ the lowest SSTs for  
741 the low TEX<sub>86</sub> values in the Maastrichtian, Paleocene and middle–late Eocene, and  
742 SSTs ~~in~~ between those based on the linear and exponential calibrations for the  
743 highest TEX<sub>86</sub> index values (Fig. 9a). U<sup>K</sup><sub>37</sub>-based SSTs (Bijl et al., 2010, with  
744 BAYSPLINE calibration) around the MECO are ~~most consistent~~ with the high SSTs  
745 ~~based on~~ the linear TEX<sub>OBL</sub> calibration, although in this TEX<sub>86</sub> range all calibrations  
746 yield SSTs within error (Fig. 9a).

747 In general, Maastrichtian (**70.5–66.7 Ma**) SSTs show a gradual cooling trend  
748 towards the late Maastrichtian–early Danian hiatus of ~800 kyrs. The early Danian  
749 (~65 Ma) is roughly 3 °C warmer than the late Maastrichtian (~67 Ma). The mid-  
750 Paleocene (62–59 Ma) shows two cooling steps: a ~2 °C cooling at 62 Ma, followed by  
751 a return to higher SSTs roughly at 60 Ma, and a ~5 °C cooling to minimum values of  
752 around 18°C around 59.5 Ma, where the record is truncated by a hiatus.

753 A hiatus straddling the early Thanetian (59.0–57.7 Ma) likely obscures the  
754 onset of late Paleocene warming out of the mid-Paleocene temperature minimum.  
755 Background latest Paleocene SSTs fluctuate considerably, but the PETM warming  
756 clearly stands out (Sluijs et al., 2011), with a magnitude (5-7 °C depending on the  
757 calibration) comparable to that in other mid- to high latitude sections and similar to  
758 the global average (Frieling et al., 2017). Post-PETM SSTs drop back to pre-PETM  
759 values completely, followed by renewed warming towards the EECO. The magnitude  
760 of warming is 6 to 11 °C depending on the choice of calibration. Smaller early Eocene  
761 hyperthermal events, ~~if represented in our record, do not clearly stand out~~ at Site  
762 1172.

763 Highest SSTs of the EECO are slightly lower than peak PETM values in all  
764 calibrations, consistent with other records (**Inglis et al., 2020**). However, a hiatus

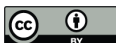

765 between 52.7 and 51.4 Ma may conceal peak EECO temperatures (Hollis et al., 2019;  
 766 Lauretano et al., 2018). A gradual SST decline commences around 49.2 Ma and  
 767 terminates the EECO, which is broadly coeval with cooling inferred from benthic  
 768 foraminiferal isotope records (Lauretano et al., 2018) and proxy records from New  
 769 Zealand (Dallanave et al., 2016; Crouch et al., 2020).  
 770

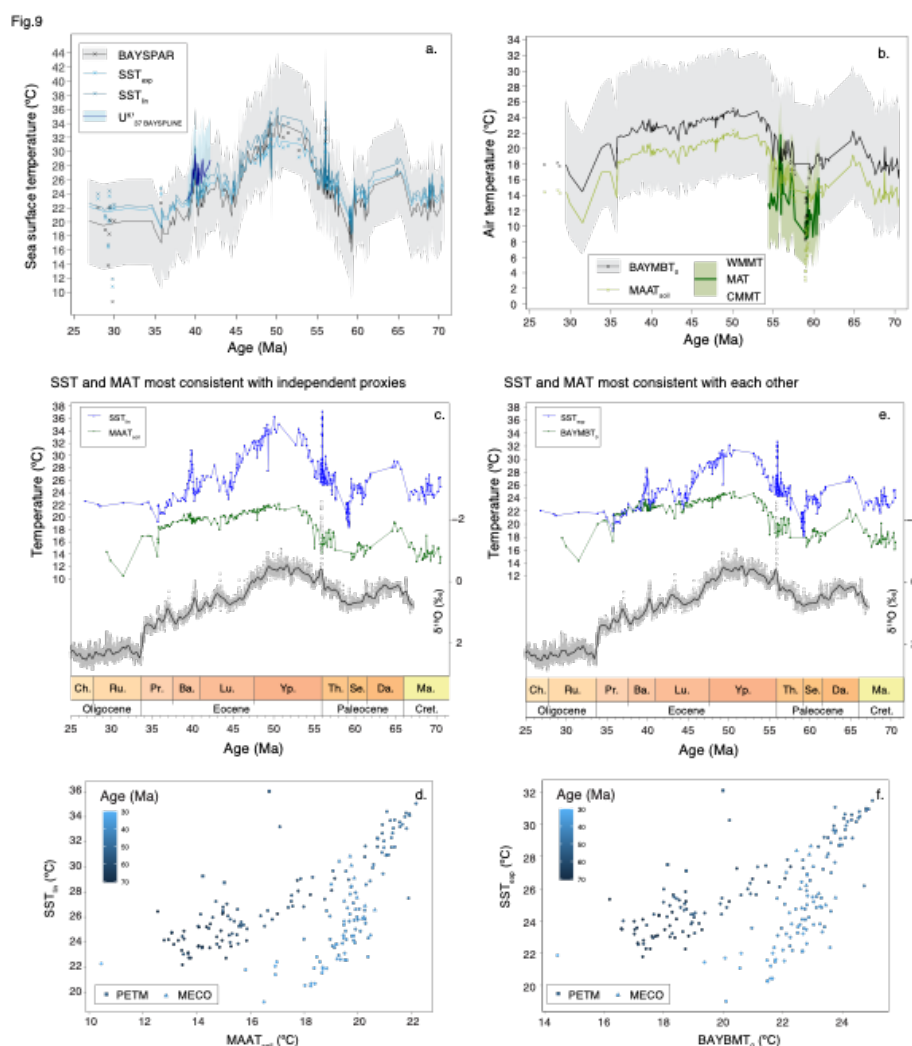

771  
 772 Figure 9. Paleothermometers. a. TEX<sub>86</sub> based SST reconstructions, using a Bayesian  
 773 (BAYSPAR; black, with 90% confidence interval in grey envelope; Tierney and



774 Tingley, 2015) an exponential ( $SST_{exp}$ ; light blue; Kim et al., 2010) and a linear ( $SST_{lin}$ ;  
775 dark blue; O'Brien et al., 2017) calibration. Also plotted are  $U^K_{37}$ -based SSTs (thick  
776 blue line; from Bijl et al., 2010, recalculated using BAYSPLINE of Tierney and Tingley,  
777 2018). Discarded samples are indicated by the crosses. b. brGDGT-based MAAT  
778 reconstructions using the Bayesian ( $BayMBT_0$ ; black, with 90% confidence interval in  
779 grey envelope; Dearing Crampton-Flood et al., 2020) and soil ( $MAAT_{soil}$ ; light green;  
780 Naafs et al., 2017b) calibrations. Discarded samples are indicated in crosses. Also  
781 plotted are pollen-based NLR-approach MAT reconstructions (thick dark green, with  
782 light green envelope representing coldest and warmest month mean temperatures;  
783 from Contreras et al., 2014). c. SST and MAAT reconstructions using the calibrations  
784 that are most consistent with independent proxies from this site (Bijl et al., 2010;  
785 Contreras et al., 2014), with the CENOGRID benthic foraminifer oxygen isotope splice  
786 of Westerhold et al., 2020 (10pnt loess smooth in grey, 500 pnt loess smooth in  
787 black). d. cross-correlation between  $SST_{lin}$  and  $MAAT_{soil}$ . e. SST and MAAT  
788 reconstructions using the calibrations that are, in absolute temperature, most  
789 consistent with each other, with the CENOGRID benthic foraminifer oxygen isotope  
790 splice of Westerhold et al., 2020 (10pnt loess smooth in grey, 500 pnt loess smooth in  
791 black). f. cross-correlation between  $SST_{exp}$  and  $BAYMBT_0$ .

792

793

794 Post-EECO cooling is gradual and of small magnitude (2 °C from peak EECO  
795 values) until about 46.4 Ma, after which it accelerates (5 °C) between 46.2 Ma and  
796 44.4 Ma. The age model in this particular part of the sequence is **complicated**, due to a  
797 **problematic** assignment of chron C21n (Bijl et al., 2010; 2013b). Following the  
798 minimum **SSTS** at 44.4 Ma, SSTs rise again towards a plateau at 42.7 Ma. An SST  
799 minimum of ~22 °C is observed just prior to the MECO, at 40.2 Ma, followed by MECO  
800 warming of about 5–7 °C ~~reached~~ at 39.9 Ma. Post-MECO cooling seems more gradual  
801 than MECO warming, although this might be the result of sedimentation rate changes  
802 (Bijl et al., 2010), which are not accounted for in our age model. SSTs are almost  
803 identical to those for the MECO at nearby Site 1170 on the South Tasman Rise  
804 (Cramwinckel et al., 2020). Post-MECO cooling transitions into gradual late Eocene  
805 cooling, down to a minimum of ~19 °C at 35.7 Ma. The following latest Eocene to



806 Oligocene TEX<sub>86</sub>-based SSTs (35–27 Ma) are 3 °C warmer, with surprisingly no  
807 cooling associated to the Eocene–Oligocene transition (Houben et al., 2019).

808

#### 809 4.2.2 MAAT

810 After excluding samples with IR values above those of local soils, we present  
811 MBT'<sub>5me</sub>-based MAAT reconstructions. These differ substantially (up to 5°C) per  
812 calibration chosen (Fig. 9b). The MAAT<sub>soil</sub> calibration yield consistently cooler MAATs  
813 (2–3°C) compared to the BAYMBT<sub>0</sub> calibration (Fig. 9b), which may be because the  
814 MAAT<sub>soil</sub> is calibrated against average temperature of the days above freezing, while  
815 BAYMBT<sub>0</sub> is calibrated against mean annual temperature. Both MAAT calibrations fall  
816 between the MAT and the warmest month mean temperature reconstruction of the  
817 sporomorph nearest living relative (NLR)-based temperature reconstruction  
818 (Contreras et al., 2014), and calibration errors largely overlap.

819 Independent of the calibration chosen, MAAT evolution reveals late  
820 Maastrichtian-early Danian warming of 3°C, gradual 4°C cooling towards the mid-  
821 Paleocene, gradual 8°C warming towards the EECO, with a conspicuous absence of  
822 warming at the PETM. Gradual cooling of 4°C starts at 49.5 Ma and continues into the  
823 Late Eocene. MAAT reaches a minimum at 43 Ma, followed by a plateau-phase. There  
824 is little warming that can be associated to the MECO. MAAT shows a conspicuous  
825 transient 3 °C cooling in the Late Eocene, at the onset of glauconite deposition. The  
826 Eocene-Oligocene Transition is characterized by another 5°C MAAT cooling.



Fig. 10

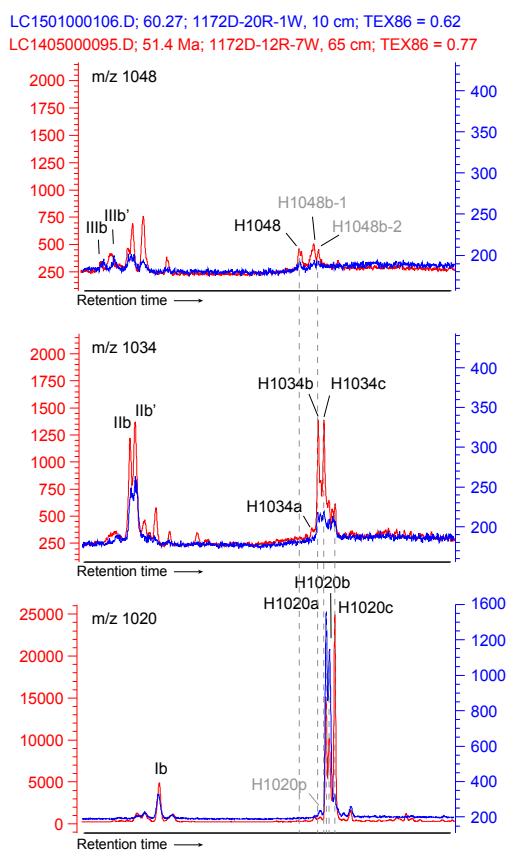

827

828

829 Figure 10. Stack of 2 UHPLC-MS chromatograms (1172D-12R-7W, 65cm in red and  
830 1172D-20R-1W, 10cm in blue) of  $m/z$  1048, 1034 and 1020 traces, between ~40 and  
831 ~60 minutes retention time, showing the pattern of peaks corresponding to brGDGTs  
832 and brGMGTs. Peak labels refer to the molecular structures in Fig. 3.

833

834

#### 835 4.3 brGMGTs

836 We detected brGMGTs throughout the record (see Fig. 10 for typical  
837 chromatograms). The exact molecular structure and position of the C-C bridge is still  
838 unknown but based on visual comparison with chromatograms of brGMGTs in  
839 African lake sediments (Baxter et al., 2019), all 7 known brGMGTs can be identified.



840 Next to H1020a, b, and c as most abundant brGMGTs, also H1034a, b and c are  
841 detected, although in some samples in the Maastrichtian, individual peaks could not  
842 be separated. Traces of H1048 can be seen at times, suggesting presence of this  
843 compound as well, albeit in low relative abundance. Next to these previously  
844 described peaks, we here recognized several other peaks that consistently occur at  
845 Site 1172: one compound that elutes just prior to H1020a, which we term H1020p  
846 (Fig. 10). ~1 minute after H1048 elutes, two more peaks appear which we here term  
847 H1048b-1 and H1048b-2 (Fig. 10). Because these have so far unknown affinities or  
848 molecular structure, we do not include them here further in our calculations.

Fig. 11

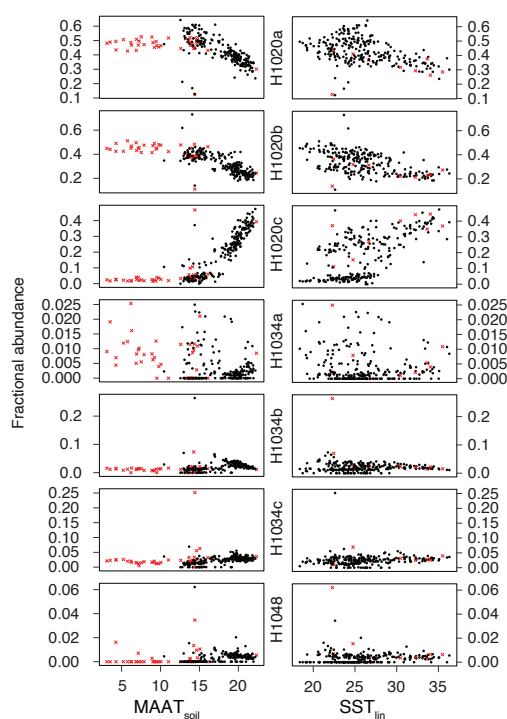

849  
850 Figure 11. Fractional abundances of brGMGTs plotted against BAYMBT<sub>0</sub> and SST<sub>exp</sub>.

851

852

853 The fractional abundances of the H1020 isomers show qualitatively similar  
854 relations to temperature as in the East African lake dataset of Baxter et al. (2019):  
855 H1020b abundance has a negative relationship with MAAT, while H1020c has a





856 positive relationship (Fig. 11). In addition, H1020a seems negatively correlated with  
857 MAAT in our data, although this compound does not show any relation to  
858 temperature in lakes (Baxter et al., 2019). The relative abundances of the H1034  
859 isomers do not show a clear relationship with MAAT (Fig. 11), similar as in the  
860 tropical lake dataset, where the scatter increases at lower (H1034b) or higher  
861 (H1034a, c) temperatures (Baxter et al., 2019).

862 Downcore trends in brGMGTI are primarily controlled by the relative  
863 abundance of H1020c and closely follow those in both SST and MAAT. Upon cross-  
864 correlation, we note that brGMGTI has a higher correlation with MAAT ( $R = 0.89$ )  
865 than with SST ( $R=0.57$ ; Fig. 12). Interestingly, the correlations between brGMGTI and  
866 temperature indices only hold for part of the dataset. Samples with high IR values, for  
867 which brGDGT-based MAAT could not be reliably interpreted, fall outside the  
868 correlation (grey crosses in Fig. 12). This is probably due to the supposed  
869 contribution of river-derived brGDGTs that may bias MAAT towards lower  
870 temperatures. In addition, we also note that brGMGTI approaches ‘saturation’  
871 (brGMGTI = 0) at reconstructed MAAT of 15°C. The correlation with temperature  
872 (MAAT and SST) is divided into 2 clusters. BrGMGTI values for samples from the  
873 younger part of the record, with BIT index  $< \sim 0.3$ , seem to correlate better to  
874 temperature than those from the older part of the record, with BIT index values  
875  $> \sim 0.3$  (Fig. 12). In the Oligocene, where many isoGDGT signals were evidently  
876 overprinted, the %brGMGTs increases (Fig. 3, 12d), and the brGMGT composition is  
877 characterized by a relatively higher abundance of H1020c, H1034b and H1048  
878 compared to the rest of the record (Fig. 3; 12).

879 There is no clear relationship between %brGMGTs and MBT<sub>5me</sub>-based MAAT  
880 (Fig. 12h, i). This ~~slightly~~ differs from the Paleocene-Eocene Arctic Ocean record  
881 (Sluijs et al., 2020), where the brGMGTI has no correlation to temperature, while  
882 %brGMGTs do. This may indicate differences in sources of brGMGTs between the  
883 sites, differences in oceanographic settings, or a non-temperature control on their  
884 distribution. HMBT<sub>acyclic</sub> ~~does seem~~ to show similar trends to the MBT<sub>5me</sub>-based  
885 MAAT (Fig. 12g), ~~like in~~ the Arctic Ocean (Sluijs et al., 2020).

886

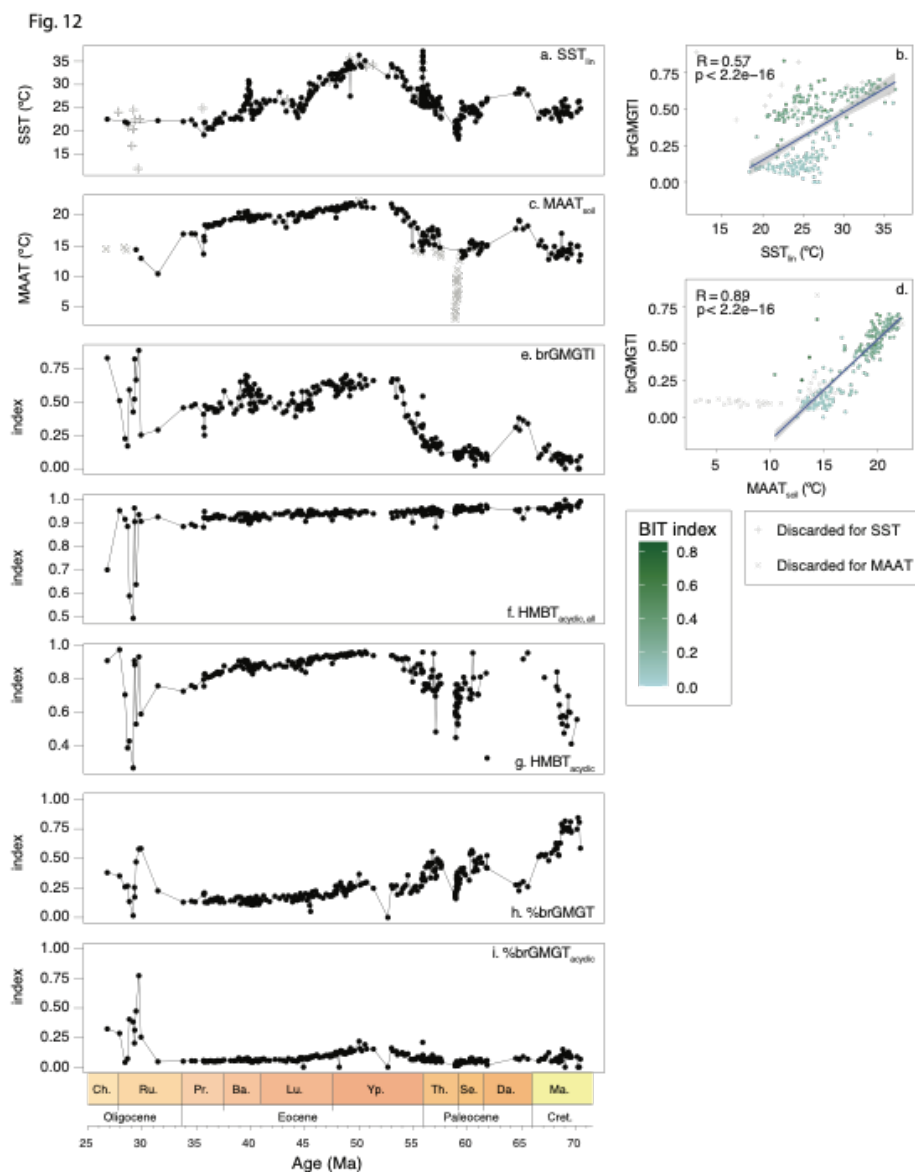

887

888 Figure 12. Time series and crossplots of brGMGT-based indices with MAAT and SST  
889 reconstructions. (a) SST<sub>lin</sub> (b) crossplot of SST<sub>lin</sub> and brGMGTI, (c) MAAT<sub>soil</sub>, (d)  
890 crossplot of MAAT<sub>soil</sub> and brGMGTI, (e) brGMGTI, (f) HMBT<sub>acyclic,all</sub>, (g) HMBT<sub>acyclic</sub>, (h)  
891 %brGMGT (Baxter et al., 2019), (i) %brGMGT<sub>acyclic</sub> (Naafs et al., 2018). For equations  
892 see Table 1). Colour variable in the crossplots indicate the BIT index value.

893



894 4.4 Palynology

895 4.4.1 Assemblages

896 Dinocyst assemblages are dominated by *Manumiella* spp. throughout the  
897 Maastrichtian, together with Goniodomideae (notably *Dinopterygium* spp.), and  
898 *Cerebrocysta* cpx. (Fig. 13). From the late Maastrichtian onwards, *Senegalinium* cpx.  
899 increases gradually in relative abundance, interrupted by acmes of *Palaeoperidinium*  
900 *pyrophorum* in the Danian and *Glaphyrocysta* cpx. in the lower Selandian. Relative  
901 abundances of *Senegalinium* cpx. reach maximum values during the mid-Paleocene  
902 and during the Paleocene–Eocene transition, while the PETM itself is characterised by  
903 abundant *Apectodinium* (~30%) and common *Senegalinium* cpx. and Goniodomideae  
904 (Sluijs et al., 2011). After the PETM, *Senegalinium* cpx. abundances temporarily  
905 increase, and are then replaced by *Deflandrea* cpx, *Spinidinium* cpx and *Elytrocysta*  
906 spp. and low abundances of various other genera, e.g., *Wetzeliella*, *Hystrichokolpoma*,  
907 Goniodomideae (Fig. 13). From 45 Ma to ~37 Ma, *Enneadocysta* spp. alternates  
908 dominance with *Deflandrea* cpx. and *Spinidinium/Vozzhennikovia* cpx, with  
909 contributions of *Phthanoperidinium* spp. (Röhl et al., 2004a). Protoperidinioid  
910 dinocysts appear commonly in the late Eocene, around 35.5 Ma (Houben et al., 2019;  
911 Sluijs et al., 2003; Fig. 13).

912

913 4.4.2 Diversity and variability

914 Together with the changing assemblage composition are some strong and  
915 coherent changes in all diversity and variability indices (Fig. 14). First, results are  
916 highly similar for the full species-level dataset and the grouped assemblages,  
917 indicating robustness of both the grouping and diversity analysis. The Maastrichtian–  
918 Paleocene assemblages are characterized by relatively low diversity, which increases  
919 towards the EECO, as variability indicated by the Gibbs index decreases. After this,  
920 diversity drops and variability increases during middle–late Eocene cooling ~49–38  
921 Ma, with an interruption around 41–39 Ma. Towards the top of the record, both  
922 diversity and variability increase.

923



Fig. 13

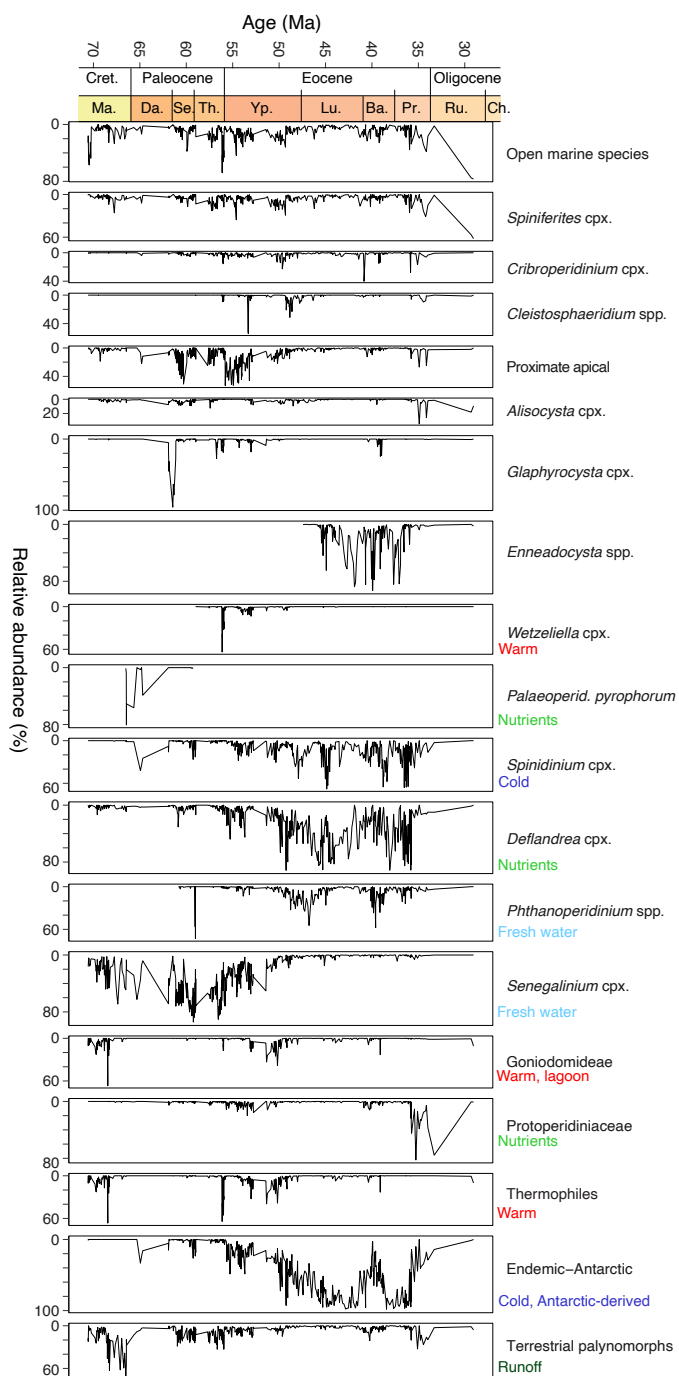



925 **Figure 13.** Dinocyst ecogroups and %terrestrial palynomorphs from Site 1172. From  
926 left to right, ecogroups are ordered in an in-shore-to-offshore transect. Relative  
927 abundance ticks represent 20%.  
928

Fig. 14

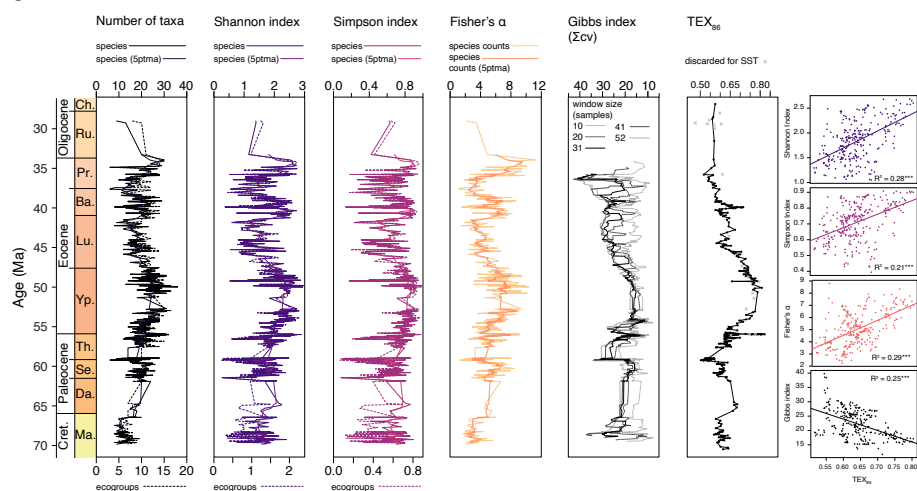

929

930 Figure 14. Dinocyst taxonomic diversity and variability through time. From left to  
931 right are plotted number of taxa (black), Shannon index (purple), Simpson index  
932 (pink), Fisher's alpha (orange) (species-based dataset in solid lines; ecogrouped  
933 dataset in dashed lines) and Gibbs index (different window sizes in gray-black). TEX<sub>86</sub>  
934 plotted for comparison. Crossplots show correlation of these indices with TEX<sub>86</sub>.

935

## 936 5. Discussion

### 937 5.1 Air and sea surface temperature evolution compared

938 The near-shore depositional setting of our record should have captured a  
939 coastal terrestrial environment with similar MAATs similar to the local SSTs. Indeed,  
940 the brGDGT-based MAAT record shows strong similarities to SST particularly in  
941 multi-million year trends (Fig. 9). Specifically, the early Danian is warmer than the  
942 Maastrichtian, and **both** records show a 2-step Paleocene cooling, late Paleocene  
943 warming towards peak values in the EECO, and middle-late Eocene cooling. On  
944 shorter time scales both records, occasionally even on sample-to-sample level, show  
945 synchronous variability (Fig. 9c, d). The independent SST (based on alkenones; Bijl et



946 al., 2010) and air temperature reconstructions (based on pollen assemblages;  
947 Contreras et al., 2014) show the best fit with the absolute SST values derived from the  
948 linear calibration for  $\text{TEX}_{86}$  (BAYSPAR or  $\text{SST}_{\text{lin}}$ ; generating the highest SST  
949 estimates), and MAATs based on the calibration using Deeming regression ( $\text{MAAT}_{\text{soil}}$ ),  
950 respectively. These are the two calibrations with the largest absolute temperature  
951 offset, particularly in the warm EECO (Fig. 9c). If the local terrestrial climate in the  
952 nearby river catchment is largely controlled by ocean temperature, the absolute mean  
953 annual SST and MAAT should be broadly similar ~~in the integrated signal of our~~  
954 ~~samples~~. This could be an argument to choose transfer functions for SST and MAAT  
955 whereby absolute temperature estimates overlap most:  $\text{SST}_{\text{exp}}$  and the Bayesian  
956  $\text{BAYMBT}_0$ . These generate overlapping absolute temperatures for the colder middle-  
957 late Eocene and Paleocene, but in the warmer Eocene time intervals SSTs remain  
958 consistently warmer (by  $\sim 8^\circ\text{C}$ ). The lower MAATs cannot be explained by a  
959 saturation of the  $\text{MBT}'_{5\text{me}}$  index that is underlying the paleothermometer, as  
960 maximum recorded  $\text{MBT}'_{5\text{me}}$  values are around 0.85 in the EECO. Accounting for the  
961 calibration errors of SST ( $\pm 2.5^\circ\text{C}$ ) and the large calibration error bar of  $\text{BAYMBT}_0$  in  
962 principle could resolve the offset but applying the extremes in calibration error to  
963  $\text{TEX}_{86}$  and  $\text{MBT}'_{5\text{me}}$  to make them consistent would make both profoundly  
964 inconsistent to the other independent SST and MAAT proxies from the same samples.  
965 More importantly, the colder MAAT compared to SST seems to be a consistent feature  
966 in many regions where  $\text{TEX}_{86}$  and  $\text{MBT}'_{5\text{me}}$  were applied together (see e.g., Hollis et  
967 al., 2019 and compare Willard et al., 2019 and Sluijs et al., 2020). The offset between  
968 MAAT and SST would have been more variable between sites if it were only the result  
969 of calibration errors.  $\text{TEX}_{86}$ -based SSTs in the southwest Pacific realm have been on  
970 the high end of many multi-proxy-based temperature reconstructions for the Eocene  
971 (Hollis et al., 2012), and therefore may be assumed to have an as yet poorly  
972 understood warm bias. However, the consistency of  $\text{TEX}_{86}$ -based SSTs with other SST  
973 proxies for specific time intervals and locations (Bijl et al., 2010; Hines et al., 2017)  
974 suggests the SST-MAAT offset cannot be easily reconciled by only invoking a warm  
975 bias in  $\text{TEX}_{86}$ . MAAT reconstructions on the other hand have been broadly consistent  
976 with nearest living relative based temperature reconstructions on pollen assemblages  
977 in many applications in the Eocene (Contreras et al., 2013; Contreras et al., 2014;



978 Pancost et al., 2013; Pross et al., 2012; Willard et al., 2019), but both brGDGT and  
979 plant-based temperature estimates are arguably prone to cold biases at the high-  
980 temperature end (e.g. Naafs et al. 2018, Van Dijk et al., 2020). In addition, it may be  
981 that the same evolutionary or bacterial community factors that make Paleogene  
982 brGDGT assemblages deviate from that in modern soils, may also cause a deviation in  
983 the calibration to MAAT. This may resolve some of the offset between MAAT and SST  
984 reconstructions. Although this implies that quantitative MAAT estimates based on  
985 MBT'<sub>5me</sub> in non-analogue settings such as the present one should be taken with care,  
986 the strong temperature dependence in Paleogene brGDGTs cannot be ignored.

987 Another surprising result is that the brGDGT-based MAAT record does not  
988 capture PETM and MECO warming (Fig. 9c), **independent of the calibration chosen**.  
989 This is remarkable for several reasons: (1) brGDGTs were measured on the same  
990 samples as isoGDGTs, which precludes a sampling bias; (2) SST changes of longer  
991 duration (Maastrichtian–Danian warming, mid-Paleocene cooling and early Eocene  
992 warming towards the EECO) are represented in the MAAT record; (3) The duration of  
993 PETM (~150-250 kyrs; Röhl et al., 2007, Zeebe & Lourens, 2019) and MECO (~400  
994 kyrs; Bohaty et al, 2009) is too long to explain the absence in MAAT warming with a  
995 lag in soil-derived OM delivery to the ocean (up to several kyr, see, e.g., Feng et al.,  
996 2013; Schefuß et al., 2016; Hurdeman et al., 2020); (4) seems incompatible with the  
997 fact that other low-amplitude, shorter-term SST changes are reflected in the MAAT  
998 record (Fig. 9c, d), which suggests that soil-derived OM did capture short-term  
999 climate variability on the time resolution of the samples; (5) Other PETM records in  
1000 the region do show a temperature response in the PETM in various proxies including  
1001 brGDGTs (Hollis et al., 2012; Pancost et al., 2013, Hurdeman et al. 2020). A lack of  
1002 MAAT rise during the PETM and the MECO could be explained by a switch from  
1003 brGDGT sourcing from soils to (peaty) lakes, **which are notoriously cold-biased**  
1004 (Tierney et al., 2010). Paleocene–Eocene peats are abundant in southeast Australia  
1005 (Holdgate et al., 2009), and it is possible that a contribution from peat lakes at times  
1006 of global warming, contributed to a dampening of the proxy-response. This may also  
1007 explain the lack of response at the EECO and explain why MBT'<sub>5me</sub> does not reach  
1008 saturation in that interval. The final option, which, although unlikely, cannot be



1009 excluded, is that a dominant fraction of the brGDGT was produced in situ and subduces  
1010 the temperature response during these warming phases.

1011 The subdued middle-late Eocene cooling in the air temperature record  
1012 compared to the strong decrease in SST is particularly clear when cross-plotting SST  
1013 *versus* MAAT (Fig. 9c, d): the relationship between the two proxies is different in the  
1014 Maastrichtian–early Eocene compared to the middle–late Eocene. This may be related  
1015 to the start of a **progressive northward tectonic drift of the Tasmanian hinterland**,  
1016 which occurred around the same time (Fig. 1). This puts the hinterland of the soil-  
1017 derived brGDGTs into warmer climate zones throughout the middle–late Eocene,  
1018 while the ETP remained under influence of the Antarctic-derived Tasman Current  
1019 (TC) through that time (Huber et al., 2004). The TC cools and likely strengthens in the  
1020 middle and late Eocene. The terrestrial climate cooled as well, but this signal will be  
1021 subdued if the soil material is sourced from a progressively lower-latitude  
1022 environment as Australia drifted northward. **Yet, one would expect that the close**  
1023 **coupling between land- and seawater temperature in near-shore environments**  
1024 **would not capture such tectonic effects.**

1025 ~~The correlation between both temperature proxies changes once more during~~  
1026 ~~the late Eocene–Oligocene, when they show a sharp cooling of 2–3 °C at the onset of~~  
1027 greensand deposition, at ~35.5 Ma. Whereas this is merely a continuation of  
1028 progressive late Eocene cooling in the SST record, the decrease in MAAT is **strongly**  
1029 **accelerated** compared to middle–late Eocene trends. Another 3–4 °C MAAT drop  
1030 occurs sometime between the late Eocene and the early Oligocene (likely associated  
1031 with the Eocene–Oligocene transition), while SSTs **returns** to warmer, middle Eocene  
1032 values ~~in this interval~~. The continued sea surface warmth across the EOT has been  
1033 related to persistent influence of the proto-Leeuwin Current (Houben et al., 2019),  
1034 which apparently retained a constant temperature across the EOT. Since MAAT  
1035 decreased while SSTs remained high, the influence of regional oceanographic changes  
1036 did not impact climate changes in the source region of brGDGTs during this time  
1037 **interval. This is surprising given the proximity of the sediment record to the coastline.**  
1038 **Minimum mid-Paleocene SSTs are lower than those for the early Oligocene.**  
1039 However, the site migrated northward by ~7 ° of latitude between the mid-Paleocene  
1040 and the early Oligocene (Fig. 1) and the oceanographic regime changed with





1041 throughflow of the proto-Leeuwin Current through the TG in the Late Eocene  
1042 (Houben et al., 2019). More remarkably, the mid-Paleocene SSTs approach those of  
1043 the warmest interglacial intervals of Oligocene Wilkes Land Margin, east Antarctica  
1044 (Hartman et al., 2018), at a similar paleolatitude as the Paleocene ETP. This suggests  
1045 that mid-Paleocene Antarctic-proximal temperatures were similar to those at times of  
1046 major Antarctic glaciation during EOT. Previous work has indeed presented  
1047 widespread evidence for low sea level during this time interval (Frieling et al., 2014;  
1048 2018; Guasti et al., 2006; Hollis et al., 2014), which combined with low SSTs suggests  
1049 the presence of some continental ice on the Antarctic continent during this mid-  
1050 Paleocene interval.

1051  
1052

## 1053 5.2 BrGMGTs

1054 The continuous presence of brGMGTs in our record appears unrelated to  
1055 depositional conditions or varying relative contributions of terrestrial material,  
1056 suggesting that at least part of the brGMGTs have a marine origin. This confirms  
1057 previous observations from the modern sediments and water column (Liu et al. 2012,  
1058 Xie et al. 2014) and Paleogene Arctic Ocean sediments (Sluijs et al., 2020). Their  
1059 sparse presence in modern soils (Peterse et al., pers comm based on metadata from  
1060 De Jonge et al., 2019; Kirkels et al., 2020) is also in line with this, although abundant  
1061 occurrence in peats and lakes (Naafs et al., 2018, Baxter et al. 2019, Tang et al., 2021)  
1062 shows clear potential for terrestrial input. Despite the uncertainties in sourcing of  
1063 brGMGTs, we find a strong resemblance with the signals from tropical lakes. The  
1064 brGMGTI, which was derived to quantify the ~~temperature relation of~~ brGMGTs in  
1065 surface sediments of East African lakes (Baxter et al., 2019), ~~seems to~~ correlate to  
1066 temperature in our record as well (Fig. 12a-d), although the better correlation of  
1067 brGMGTI with MAAT than with SST (~~Fig. 12a-d~~) seems to be at odds with the  
1068 presumed marine source of brGMGTs in our record. Despite all potential  
1069 complications, our study provides additional evidence that a temperature signal may  
1070 be governing the distribution of the different brGMGT isomers, as proposed by  
1071 (Baxter et al., 2019), but there are differences as well. For instance, H1020c is  
1072 altogether absent in the cold mid-Paleocene part of our record. There are numerous



1073 ways in which this can be explained, e.g., the biosynthesis of H1020c occurs only  
1074 above a certain temperature, or the microbes that biosynthesize H1020c do not live  
1075 at low temperatures, or the site receives brGMGTs from a different catchment in  
1076 colder climates. Indeed, H1020c was almost absent in the cold (<12°C), high-altitude  
1077 tropical lake samples (Baxter et al. 2019). However, those cold lakes did have high  
1078 relative abundance of H1048 (Baxter et al., 2019), which our record lacks in the cold  
1079 mid-Paleocene, illustrating the differences between modern lakes and our marine  
1080 depositional setting.

1081 The HMBT record does not reflect a temperature signal when using all  
1082 brGMGT isomers in the calculation (Fig. 12f), as H1020 isomers are by far the most  
1083 abundant brGMGTs at Site 1172, and any change in the abundance of H1020c is  
1084 compensated by both H1020b and H1020a in our record. In contrast, only using the  
1085 H1020c and H1034b isomers, which following the chromatographic peak  
1086 identification of Sluijs et al. (2020) match the compounds used to derive the HMBT  
1087 index based on brGMGTs in peats (Naafs et al., 2018), does show a correlation to  
1088 temperature in our record (Fig. 12g).

1089 ~~%brGMGT as calculated in Naafs et al., (2018) or as in Baxter et al., (2019)~~  
1090 does not show a clear relation with temperature (Fig. 12h, i), in contrast to  
1091 observations in modern peats (Naafs et al., 2018a) and lake sediments (Baxter et al.,  
1092 2019). We do note the extremely high %brGMGT (~80%) in the Maastrichtian and  
1093 Oligocene, much higher than seen anywhere so far. We also do not see a clear inverse  
1094 relationship between %brGMGT and BIT index, as in Sluijs et al. (2020). This may be  
1095 because of the complexity in the relative abundance of brGDGTs in the record, which  
1096 ~~does not necessarily reflect the variation in terrestrial versus marine sourcing.~~

1097 The higher relative abundance and change in composition of brGMGT  
1098 composition in the Oligocene that coincides with abundant signs of overprints in all  
1099 br- and isoGDGT indices may indicate a source change of brGMGTs in this interval,  
1100 e.g., related to the same changes in contribution that cause the overprints in  
1101 isoGDGTs. The differences in brGMGT signals between our record, the Eocene Arctic  
1102 Ocean record and modern sediments demonstrate that more research is needed on  
1103 their sources and environmental dependencies to further assess their use and value  
1104 in paleoreconstructions.



1105

1106

1107 5.3 Integrated paleoenvironmental and climatological reconstruction

1108 5.3.1 Sea level and ecosystem response to SST changes

1109 The abundance of temperature-responsive dinocyst eco-groups qualitatively  
1110 confirm our SST trends. The thermophile dinocyst eco-group shows higher relative  
1111 abundance at higher SSTs (Fig. 15). This eco-group has been empirically associated to  
1112 SST based on its strong affinity to high SST in the global compilation of late  
1113 Paleocene-early Eocene records (Frieling and Sluijs, 2018), and we here confirm this  
1114 relationship for the longer early Paleogene. The relationship between isoGDGT-based  
1115 SSTs and relative abundance of the supposedly cold-affiliated endemic dinocysts (Bijl  
1116 et al., 2011) is not as clear. This might be because the majority of dinocyst species  
1117 within the Endemic-Antarctic dinocyst ecogroup are restricted to the Eocene (Bijl et  
1118 al., 2011).

1119 Indeed, from 50 Ma onwards, SST does have a correlation with the %endemic  
1120 Antarctic dinocyst abundance in the record (Fig. 15; Bijl et al., 2011), which may  
1121 indicate a more distinct biogeographical separation through the development of  
1122 stronger meridional gradients or evolutive adaptation of the endemic dinocyst  
1123 community to more polar environments following the extreme warmth of the EECO.  
1124 We particularly note the strong correlation between TEX<sub>86</sub>-based SST and relative  
1125 abundance of more open ocean-affiliated dinocysts (Fig. 13), which suggests that SST  
1126 correlates with regional sea level. SST-induced sea level changes hint at steric effects  
1127 as driver. Indeed, because of the flatness of continental shelf areas during long-term  
1128 greenhouse climates (Somme et al., 2009) small changes in regional sea level will  
1129 cause large changes in distance to shore and associated characteristics, including e.g.  
1130 salinity, nutrients and suspended sediment loads, which subsequently shapes the  
1131 dinocyst assemblages.

1132



Fig.15  
GDGT- and palynology-based proxies for SST

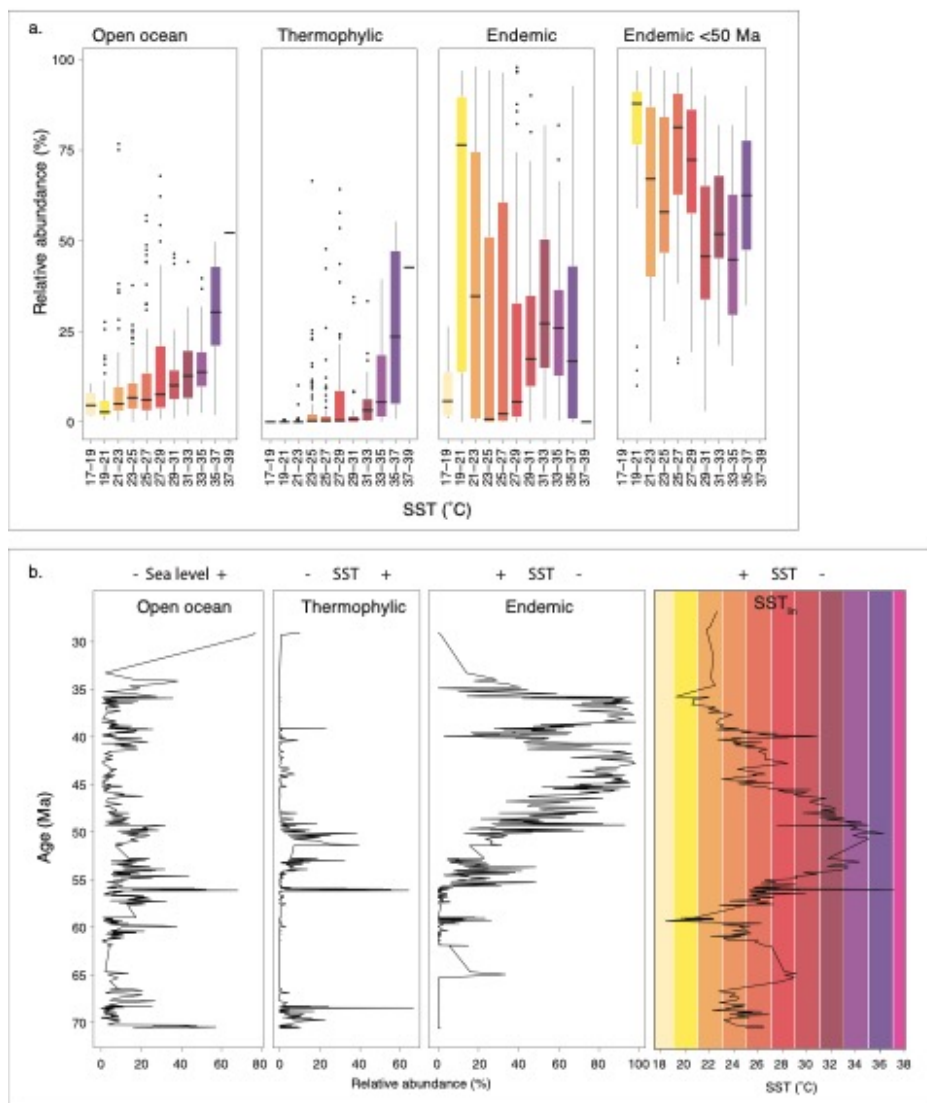

1133  
1134 Figure 15. isoGDGT- and palynology-based proxies for SST. a. relative abundance of  
1135 open ocean, thermophylic and endemic-Antarctic dinocysts (total dataset and  
1136 samples <50Ma only) plotted against linearly interpolated (resampled) TEX<sub>86</sub>-based  
1137 SST, in 2 degree bins. b. Time series of the same dinocyst ecogroups and SST.  
1138



1139           The SST control on dinocyst assemblages is further demonstrated in diversity  
1140 and assemblage variability indices. Throughout the long time interval covered in our  
1141 record, dinocyst richness and diversity show a remarkably similar pattern to  $TEX_{86}$ -  
1142 based SST. Species richness, as well as diversity expressed in the Shannon and  
1143 Simpson indices and Fisher's alpha reach a maximum during the prolonged warmth  
1144 of the EECO and drop during middle-late Eocene cooling. These relationships are  
1145 demonstrated by modest correlation coefficient between diversity and  $TEX_{86}$  (Fig.  
1146 13). This pattern holds for the long-term trends, as well as for the short-term PETM,  
1147 but not for the MECO. Dinocyst diversity is known to vary in an inshore-to-offshore  
1148 transect in the modern and Eocene (Brinkhuis, 1994; Pross and Brinkhuis, 2005). As  
1149 our assemblages indeed consist of many mid-shelf species, the strong correlation  
1150 between diversity and SST might thus be indirectly related through habitat size, with  
1151 expansion of the flat shelf area and thereby increase in shelf niches during the EECO  
1152 (Somme et al., 2009). Variability as indicated by the Gibbs index records the opposite  
1153 pattern to diversity for the long-term trends into and out of the EECO (Fig 14). That  
1154 is, the lower-diversity assemblages in general have a higher variability, or sample-to-  
1155 sample fluctuations within the relative abundances. This indicates the higher  
1156 diversity dinocyst assemblages might be more ecologically resilient.

### 1157           5.3.2 Marine environmental response to runoff changes

1158           *Senegalinium* cpx. abundance broadly correlates with the IR (Fig. 16), which  
1159 signals input of river-produced brGDGTs. *Senegalinium* cpx. is generally thought to  
1160 have tolerated low salinity environments (Barke et al., 2011; Sluijs et al., 2005; Sluijs  
1161 and Brinkhuis, 2009). These two proxies together confirm a large input of fresh water  
1162 at this site during the mid-to-late Paleocene in line with high relative abundance of  
1163 terrestrial palynomorphs, low abundances of open ocean dinocysts and high IR values  
1164 (Fig. 16). Interestingly, *Phthanoperidinium* spp., which is also generally associated  
1165 with low-salinity to near fresh-water conditions (Barke et al., 2011; Frieling and  
1166 Sluijs, 2018; Sluijs and Brinkhuis, 2009) does not correlate to IR (Fig. 16). Because we  
1167 find different species of *Phthanoperidinium* spp. than those previously associated to  
1168 fresh-water conditions (e.g., Barke et al., 2011), it could be that the fresh-water  
1169 tolerance of *Phthanoperidinium* spp. was not shared among all species. It could also  
1170 be that *Phthanoperidinium* spp. is slightly less euryhaline than *Senegalinium*.



1171 Tasmania was located at latitudes between 55° and 60° S, in the middle of the  
1172 region of strong westerly winds, within the range of low atmospheric pressure and  
1173 received a large amount of precipitation during the Paleocene (Huber and Caballero,  
1174 2011). River input from Tasmania and perhaps also Australia could have reached the  
1175 site. Interestingly, while Tasmania migrated northwards only a few degrees latitude  
1176 between 60 and 40 Ma (Fig. 1), the freshwater input decreased, based on both  
1177 *Senegalinium* cpx., terrestrial palynomorph abundance (decimated abundance from  
1178 50 Ma onwards) and the IR (decrease to normal values around 54 Ma; Fig. 16). This  
1179 suggests either a rerouting of river input or a **drying of the hinterland**. Support for the  
1180 latter comes from clay mineralogical data, showing an increase in kaolinite starting at  
1181 50 Ma (Fig. 2; Robert, 2004). Kaolinite forms abundantly at the base of acidic peats  
1182 (Staub and Cohen, 1978; Korasidis et al., 2019) and in old, leached soils, which were  
1183 ubiquitous in the Eocene Australian hinterland (Holdgate et al., 2009). While the  
1184 hinterland could well retain the kaolinite-rich clays during the Maastrichtian and  
1185 Paleocene, because the site was under a year-round high precipitation regime, it was  
1186 less efficient in doing so when the hinterland experienced drier, more variable  
1187 climatic conditions as Australia migrated northward. The increase in kaolinite  
1188 delivery to Site 1172 is hence interpreted as a signal of enhanced soil (or peat)  
1189 erosion from the catchment areas in Tasmania and SW, as a result of a more variable  
1190 **climate regime**.

1191

#### 1192 5.4 Environmental and climatological changes in the catchment

1193 The long-term trends in the BIT index are at odds with all the river runoff  
1194 indicators in our data. BIT remains low during the ~~presumed~~ interval with increased  
1195 river water ~~discharge, as indicated by~~ the high IR and abundance of *Senegalinium* and  
1196 increases when this river-input signal ~~ceases~~. This is unexpected, because the BIT  
1197 index should reflect high input of soil-derived brGDGTs into the marine sediments,  
1198 associated with increased discharge (Hopmans et al., 2004). There are two ways to  
1199 explain this signal. The BIT index could **be responding** to marine crenarchaeol  
1200 production, rather than to the terrestrial brGDGT flux. Indeed, marine productivity  
1201 could have been spurred by runoff and associated nutrient delivery to the coastal  
1202 zone during the Paleocene, and decreased in the Eocene, affecting BIT index **values**.



1203 Another explanation is that the BIT index has been influenced by crenarchaeol  
1204 production ~~in the river~~ (Zell et al., 2013), although ~~the river produced~~ crenarchaeol  
1205 concentrations are normally negligible compared to ~~that~~ produced in the marine  
1206 realm. Decreasing BIT index values with increasing river-and soil input has been  
1207 related to catchment dynamics in the late Quaternary Zambezi river (Lattaud et al.,  
1208 2017), ~~involving~~ vegetation dynamics ~~controlling~~ soil-OM input. Studies ~~on~~ modern  
1209 soil-river-ocean pathways in the Amazon River system show that whereas river-  
1210 suspended brGDGTs in its upper tributaries reflect catchment soils (Kirkels et al.,  
1211 2020), brGDGTs in the lower Amazon receive increasing contributions of in situ  
1212 produced brGDGTs (Zell et al., 2013), and marine surface sediments of the Amazon  
1213 fan contain a mix of soil, riverine, and marine brGDGTs (Zell et al., 2014). In a high-  
1214 precipitation, soil-rich environment like the Amazon basin, this can only occur if the  
1215 river-produced brGDGT production progressively exceeds the soil-derived brGDGTs  
1216 ~~input in river water~~ along the trajectory of the river, or when the soil-derived  
1217 brGDGTs are preferentially remineralized during river transport. We here propose  
1218 the following scenario to explain the BIT index trends: In the ~~Paleocene-early Eocene~~,  
1219 excessive, year-round precipitation-fed river runoff caused strong fresh-water  
1220 delivery into the sw Pacific. Soil-derived brGDGTs were partly remineralized in the  
1221 river catchment, and the strongly diluted soil-derived OM was dominated by river-  
1222 produced brGDGTs and crenarchaeol, both in river production and on the continental  
1223 shelf, which suppressed the BIT index. This explains the **unexpectedly cold MAATs**  
1224 derived from the mid-Paleocene samples with high IR. The high riverine input ~~did~~  
1225 ~~promote~~ pelagic isoGDGT production: ~~crenarchaeol~~ which decreases the BIT index  
1226 and isoGDGTs in general. In the ~~early Eocene~~, precipitation in the hinterland  
1227 decreased as the hinterland gradually drifted out of the zone of intense precipitation.  
1228 This reduced river discharge, but at the same time the more **dynamic climate regime**  
1229 caused more seasonal precipitation which increased destabilization of Australian and  
1230 Tasmanian soils, leading to a higher abundance of soil-derived brGDGTs and kaolinite  
1231 from destabilized soils in the river discharge, and relatively little river-produced  
1232 brGDGTs (because enhanced soil-OM content increased turbidity) and river-produced  
1233 crenarchaeol, which increased BIT index ~~at the ETP~~.





Fig. 16  
GDGT- and palynology-based proxies for runoff

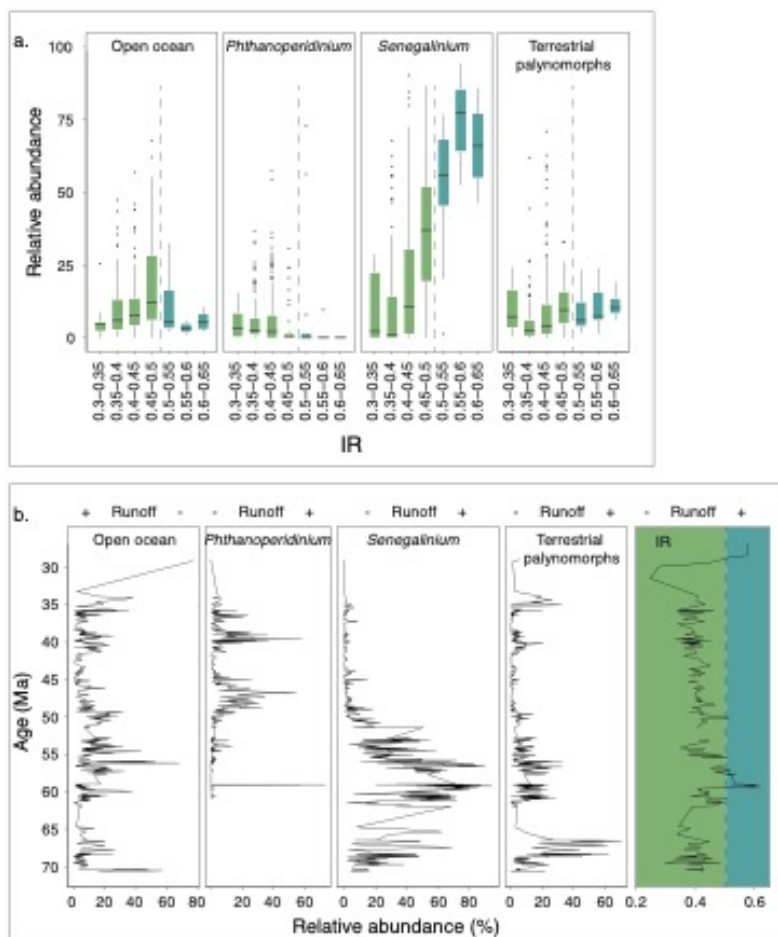

1234

1235 Figure 16. BrGDGT- and palynology-based proxies for river runoff. a. relative  
1236 abundance of Open Ocean, *Phthanoperidinium* spp., *Senegalium* cpx. and terrestrial  
1237 palynomorphs in 0.05 index unit bins of the resampled IR. Dashed line separates  
1238 elevated IR bins from non-elevated IR bins. b. Time series of the same palynology  
1239 ecogroups and the IR.

1240

1241

1242

1243





## 1244 6. Conclusions

1245 We have critically reviewed the GDGT- and dinoflagellate cyst data in samples from  
1246 the Maastrichtian–lower Oligocene sediments at ODP Site 1172. IsoGDGTs represent  
1247 a pelagic signal throughout the Maastrichtian–Eocene and are influenced by  
1248 sedimentary-produced isoGDGTs in the Oligocene. BrGDGTs at our site are likely  
1249 primarily soil- or peat-derived, albeit evolutionary changes in brGDGT production  
1250 may have altered the Paleogene soil brGDGT composition. Exceptions are the mid-  
1251 Paleocene, where river-produced brGDGTs influence the record, and the Oligocene,  
1252 where marine in situ produced brGDGTs dominate. TEX<sub>86</sub> and MBT<sub>5me</sub> records reveal  
1253 the SST and MAAT evolution of the region, respectively, consistent with independent  
1254 existing paleotemperature reconstructions from the same samples. A temperature  
1255 offset between the SST and MAAT proxies remains poorly reconciled with the coastal  
1256 proximity of the site but is likely a combined effect of evolutionary differences in  
1257 MBT<sub>5me</sub>-MAAT relationships and a disparate integration of climate signals by both  
1258 proxies. The subdued air temperature cooling in the middle Eocene compared to the  
1259 SST cooling could in part reflect progressive northward tectonic drift of the  
1260 hinterland, while SSTs remained continuously influenced by the Antarctic-derived  
1261 Tasman Current. Strong MAAT cooling occurred step-wise around the Eocene–  
1262 Oligocene transition. The absence of SST cooling around the Eocene–Oligocene  
1263 transition suggests some disconnection between oceanographic reorganisations and  
1264 regional MAAT changes. The absence of a MAAT response at the PETM and MECO  
1265 remains unresolved but might be related to shifting sources of brGDGTs during these  
1266 warm phases.

1267 The relatively high IR, and low #rings<sub>tetra</sub> confirm dinocyst assemblages characteristic  
1268 of an inner mid-shelf depositional setting. We reconstruct strong river-runoff in the  
1269 Paleocene–early Eocene at this site, and normal open-marine conditions thereafter.  
1270 The latter reflects a drying and increased seasonality in precipitation in the  
1271 catchment as the continent tectonically migrates northwards, out of the region of  
1272 strong precipitation during the middle and late Eocene. The correlation between SST  
1273 and changes dinoflagellate cyst assemblages and biodiversity metrics suggest  
1274 temperature-controlled sea level changes influenced the site, probably through steric  
1275 effects. We find corroborating evidence for a temperature signal in brGMGT



1276 assemblages, further demonstrating the potential to develop novel proxies with more  
1277 extensive studies **on** modern **affinities**.

1278

## 1279 **7. Supplements**

- 1280 • Table S1: Age tie points
- 1281 • Table S2: grouping of dinocysts in ecogroups

1282

## 1283 **8. Data availability**

1284 Raw GDGT/GMGT and palynological data presented in this paper, as well as R  
1285 markdown code for data analysis and visualization can be found on Github  
1286 (<https://github.com/bijlpeter83/RGDGT.git>). Data was deposited at zenodo under  
1287 DOI:10.5281/zenodo.4471204.

1288

## 1289 **9. Author contributions**

1290 AS (PETM) and PKB (part) prepared samples for GDGT analyses. PKB (part), AS  
1291 (PETM) and CB (part) integrated UHPLC-MS results. AS (PETM) and PKB (part)  
1292 analysed palynological samples. All authors contributed to the interpretation of the  
1293 OG results, and PKB, AS, JF and MC interpreted dinocyst results. PKB wrote the R  
1294 script for data analyses and visualization, drafted the figures and wrote the paper  
1295 with input from all authors.

1296

## 1297 **10. Acknowledgements**

1298 This research used samples from the Ocean Drilling Program, which was funded  
1299 through U.S. National Science foundation under the management of joined  
1300 oceanographic institutions, inc. We thank Klaas Nierop, Desmond Eefting and Natasja  
1301 Welters for technical/analytical support. PKB acknowledges funding through NWO  
1302 Vernieuwingsimpuls Veni grant no. 863.13.002. This work was carried out under the  
1303 program of the Netherlands Earth System Science Centre (NESSC), financially  
1304 supported by the Dutch Ministry of Education, Culture and Science. MC and AS thank  
1305 the Ammodo Foundation for funding unfettered research of laureate AS. PB and AS  
1306 thank the European Research Council for Starting Grant 802835 OceaNice and  
1307 Consolidator Grant 771497 SPANC, respectively.

1308



1309 **11. References**

- 1310 Anagnostou, E., John, E. H., Edgar, K. M., Foster, G. L., Ridgwell, A., Inglis, G. N., et al.:
- 1311 Changing atmospheric CO<sub>2</sub> concentration was the primary driver of early
- 1312 Cenozoic climate, *Nature*, 533, 380-384, doi:10.1038/nature17423, 2016.
- 1313 Barke, J., Abels, H. A., Sangiorgi, F., Greenwood, D. R., Sweet, A. R., Donders, T., et al.:
- 1314 Orbitally forced Azolla blooms and middle Eocene Arctic hydrology: Clues from
- 1315 palynology, *Geology*, 39, 427-430, 2011.
- 1316 Baxter, A. J., Hopmans, E. C., Russell, J. M., and Sinninghe Damsté, J. S.: Bacterial GMGTs
- 1317 in east african lake sediments: Their potential as palaeotemperature indicators,
- 1318 *Geochimica et Cosmochimica acta* 259: 155-169,
- 1319 doi:<https://doi.org/10.1016/j.gca.2019.05.039>, 2019.
- 1320 Beerling, D. J., and Royer, D. L.: Convergent Cenozoic CO<sub>2</sub> history, *Nature Geoscience*,
- 1321 4, 418-420, 2019.
- 1322 Bijl, P. K., Bendle, A. P. J., Bohaty, S. M., Pross, J., Schouten, S., Tauxe, L., et al.: Eocene
- 1323 cooling linked to early flow across the Tasmanian Gateway, *Proceedings of the*
- 1324 *National Academy of Sciences of the United States of America* 110(24), 9645-
- 1325 9650, 2013a.
- 1326 Bijl, P. K., Brinkhuis, H., Egger, L. M., Eldrett, J. S., Frieling, J., Grothe, A., et al.: Comment
- 1327 on 'Wetzeliella and its allies—the 'hole' story: A taxonomic revision of the
- 1328 Paleogene dinoflagellate subfamily Wetzelielloideae' by Williams et al. (2015).
- 1329 *Palynology*, 41(3), 423-429. doi:10.1080/01916122.2016.1235056, 2017.



- 1330 Bijl, P. K., Houben, A. J. P., Schouten, S., Bohaty, S. M., Sluijs, A., Reichart, G.J., et al.:  
1331 Transient middle Eocene atmospheric carbon dioxide and temperature  
1332 variations, *Science* 330, 819-821, 2010.
- 1333 Bijl, P. K., Pross, J., Warnaar, J., Stickley, C. E., Huber, M., Guerin, R., et al.:  
1334 Environmental forcings of Paleogene Southern Ocean dinoflagellate  
1335 biogeography, *Paleoceanography* 26, PA1202, 2011.
- 1336 Bijl, P. K., Schouten, S., Brinkhuis, H., Sluijs, A., Reichart, G.J., and Zachos, J. C.: Early  
1337 Palaeogene temperature evolution of the southwest Pacific Ocean, *Nature* 461,  
1338 776-779, 2009.
- 1339 Bijl, P. K., Sluijs, A., and Brinkhuis, H.: A magneto- chemo- stratigraphically calibrated  
1340 dinoflagellate cyst zonation of the early Paleogene South Pacific Ocean, *Earth-*  
1341 *Science Reviews* 124, 1-31, 2013b.
- 1342 Bijl, P. K., Sluijs, A., and Brinkhuis, H.: Erratum to "A magneto- and  
1343 chemostratigraphically calibrated dinoflagellate cyst zonation of the early  
1344 Paleogene South Pacific Ocean" [*Earth sci. rev.* 124 (2013) 1-31], *Earth-Science*  
1345 *Reviews* 134, 160-163. doi:10.1016/j.earscirev.2014.03.010, 2014.
- 1346 Blaga, C. I., Reichart, G.-J., Heiri, O., and Sinninghe Damsté, J. S.: Tetraether membrane  
1347 lipid distributions in water-column particulate matter and sediments: A study of  
1348 47 European lakes along a north-south transect, *Journal of Paleolimnology* 41(3),  
1349 523-540, doi:10.1007/s10933-008-9242-2, 2009



- 1350 Bohaty, S. M., Zachos, J. C., and Delaney, M. L.: Foraminiferal Mg/Ca evidence for  
1351 Southern Ocean cooling across the Eocene–Oligocene transition, *EPSL*,  
1352 doi:<https://doi.org/10.1016/j.epsl.2011.11.037>, 2012
- 1353 Bohaty, S. M., Zachos, J. C., Florindo, F., and Delaney, M. L.: Coupled greenhouse  
1354 warming and deep-sea acidification in the middle Eocene, *Paleoceanography* 24,  
1355 doi:10.1029/2008PA001676, 2009
- 1356 Brinkhuis, H.: Late Eocene to early Oligocene dinoflagellate cysts from the Priabonian  
1357 type-area (northeast Italy); biostratigraphy and palaeoenvironmental  
1358 interpretation, *Palaeogeography, Palaeoclimatology, Palaeoecology* 107, 121-  
1359 163, 1994.
- 1360 Brinkhuis, H., Sengers, S., Sluijs, A., Warnaar, J., and Williams, G. L.: Latest Cretaceous  
1361 to earliest Oligocene, and Quaternary dinoflagellates from ODP site 1172, East  
1362 Tasman Plateau, In N. Exon, and J. P. Kennett (Eds.), *Proceedings of the Ocean  
1363 Drilling Program, scientific results, volume 189*. College Station, Texas: U.S.  
1364 Government Printing Office, 2003.
- 1365 Cande, S. C., and Stock, J. M.: Cenozoic reconstructions of the Australia-new Zealand-  
1366 south Pacific sector of antarctica, In N. F. Exon, J. P. Kennett and M. Malone (Eds.),  
1367 *The Cenozoic Southern Ocean: Tectonics, sedimentation and climate change  
1368 between australia and Antarctica* (pp. 5-18) *Geophysical Monograph Series*,  
1369 American Geophysical Union, 2004.



- 1370 Carpenter, R. J., Jordan, G. J., Macphail, M. K., and Hill, R. S.: Near-tropical early Eocene  
1371 terrestrial temperatures at the Australo-Antarctic margin, western Tasmania,  
1372 *Geology*, 40(3), 267-270, doi:10.1130/G32584.1, 2012
- 1373 Contreras, L., Pross, J., Bijl, P. K., Koutsodendris, A., Raine, J. I., van de Schootbrugge, B.,  
1374 et al.: Early to middle Eocene vegetation dynamics at the Wilkes Land Margin  
1375 (Antarctica), *Review of Palaeobotany and Palynology* 197, 119-142, 2013.
- 1376 Contreras, L., Pross, J., Bijl, P. K., O'Hara, R. B., Raine, J. I., Sluijs, A., et al.: Southern  
1377 high-latitude terrestrial climate change during the Palaeocene-Eocene derived  
1378 from a marine pollen record (ODP site 1172, East Tasman Plateau), *Climate of the*  
1379 *Past*, 10(4), 1401-1420, doi:10.5194/cp-10-1401-2014, 2014.
- 1380 Cramwinckel, M. J., Huber, M., Kocken, I. J., Agnini, C., Bijl, P. K., Bohaty, S. M., et al.:  
1381 Synchronous tropical and deep ocean temperature evolution in the Eocene,  
1382 *Nature* 559, 382-386, 2018.
- 1383 Cramwinckel, M. J., Woelders, L., Huurdeman, E. P., Peterse, F., Gallagher, S. J., Pross, J.,  
1384 et al.: Surface-circulation change in the Southern Ocean across the Middle Eocene  
1385 Climatic Optimum: Inferences from dinoflagellate cysts and biomarker  
1386 paleothermometry, *Climate of the Past*, , 1-34, 2020
- 1387 Creech, J. B., Baker, J. A., Hollis, C. J., Morgans, H. E. G., and Smith, E. G. C.: Eocene sea  
1388 temperatures for the mid-latitude southwest Pacific from Mg/Ca ratios in  
1389 planktonic and benthic foraminifera, *Earth and Planetary Science Letters*, 299,  
1390 483-495, 2010.



- 1391 Crouch, E. M., Shepherd, C. L., Morgans, H. E. G., Naafs, B. D. A., Dallanave, E., Phillips,  
1392 A., et al.: Climatic and environmental changes across the Early Eocene Climatic  
1393 Optimum at mid-Waipara River, Canterbury Basin, New Zealand, *Earth-Science*  
1394 *Reviews*, 200, doi:10.1016/j.earscirev.2019.102961, 2020.
- 1395 Dallanave, E., Bachtadse, V., Crouch, E. M., Tauxe, L., Shepherd, C. L., Morgans, H. E. G.,  
1396 et al.: Constraining early to middle Eocene climate evolution of the southwest  
1397 Pacific and Southern Ocean. *Earth and Planetary Science Letters*, 433, 380-392.  
1398 doi:10.1016/j.epsl.2015.11.010, 2016
- 1399 De Jonge, C., Hopmans, E. C., Stadnitskaia, A., Rijpstra, W. I. C., Hofland, R., Tegelaar, E.,  
1400 et al.: Identification of novel penta- and hexamethylated branched glycerol dialkyl  
1401 glycerol tetraethers in peat using HPLC-MS2, GC-MS and GC-SMB-MS, *Organic*  
1402 *Geochemistry* 54, 78-82, doi:10.1016/j.orggeochem.2012.10.004, 2013.
- 1403 De Jonge, C., Hopmans, E. C., Zell, C. I., Kim, J. -, Schouten, S., and Sinninghe Damsté, J.  
1404 S.: Occurrence and abundance of 6-methyl branched glycerol dialkyl glycerol  
1405 tetraethers in soils: Implications for palaeoclimate reconstruction, *Geochimica et*  
1406 *Cosmochimica Acta*, 141, 97-112. doi:10.1016/j.gca.2014.06.013, 2014a.
- 1407 De Jonge, C., Stadnitskaia, A., Cherkashov, G., and Sinninghe Damsté, J. S.: Branched  
1408 glycerol dialkyl glycerol tetraethers and crenarchaeol record post-glacial sea  
1409 level rise and shift in source of terrigenous brGDGTs in the Kara Sea (Arctic  
1410 Ocean), *Organic Geochemistry* 92, 42-54,  
1411 doi:10.1016/j.orggeochem.2015.11.009, 2016.



- 1412 De Jonge, C., Stadnitskaia, A., Hopmans, E. C., Cherkashov, G., Fedotov, A., and  
1413 Sinninghe Damsté, J. S.: In situ produced branched glycerol dialkyl glycerol  
1414 tetraethers in suspended particulate matter from the Yenisei River, eastern  
1415 Siberia, *Geochimica et Cosmochimica Acta*, 125, 476-491,  
1416 doi:10.1016/j.gca.2013.10.031, 2014b.
- 1417 De Jonge, C., Stadnitskaia, A., Hopmans, E. C., Cherkashov, G., Fedotov, A., Streletskaya,  
1418 I. D., et al.: Drastic changes in the distribution of branched tetraether lipids in  
1419 suspended matter and sediments from the Yenisei River and Kara Sea (Siberia):  
1420 Implications for the use of brGDGT-based proxies in coastal marine sediments,  
1421 *Geochimica et Cosmochimica Acta* 165, 200-225, doi:10.1016/j.gca.2015.05.044,  
1422 2015.
- 1423 De Jonge, C., Radujković, D., Sigurdsson, B. D., Weedon, J. T., Janssens, I., and Peterse,  
1424 F.: Lipid biomarker temperature proxy responds to abrupt shift in the bacterial  
1425 community composition in geothermally heated soils, *Org Geochem*, 137, 894  
1426 103897, <https://doi.org/10.1016/j.orggeochem.2019.07.006>, 2019.
- 1427 Dearing Crampton-Flood, E., Peterse, F., and Sinninghe Damsté, J. S.: Production of  
1428 branched tetraethers in the marine realm: Svalbard fjord sediments revisited,  
1429 *Organic Geochemistry* 138 doi:10.1016/j.orggeochem.2019.103907, 2019.
- 1430 Dearing Crampton-Flood, E., Tierney, J. E., Peterse, F., Kirkels, F M S A, and Sinninghe  
1431 Damsté, J. S. BayMBT: A bayesian calibration model for branched glycerol dialkyl  
1432 glycerol tetraethers in soils and peats, *Geochimica Et Cosmochimica Acta*, 268,  
1433 142-159, doi:10.1016/j.gca.2019.09.043, 2020.





- 1434 Douglas, P. M. J., Affek, H. P., Ivany, L. C., Houben, A. J. P., Sijp, W. P., Sluijs, A.,  
1435 Schouten, S., Pagani, M.: Pronounced zonal heterogeneity in Eocene southern  
1436 high latitude sea surface temperatures, PNAS 111 (18), 6582-6587, 2014.
- 1437 Elling, F. J., Kanneke, M., Lipp, J. S., Becker, K. W., Gagen, E. J., and Hinrichs, K.-U.: Effects  
1438 of growth phase on the membrane lipid composition of the thaumarchaeon  
1439 Nitrosopumilus maritimus and their implications for archaeal lipid distributions  
1440 in the marine environment, Geochim Cosmochim Acta, 141, 579-597,  
1441 <https://doi.org/10.1016/j.gca.2014.07.005>, 2014.
- 1442 Evans, D., Sahoo, N., Renema, W., Cotton, L. J., Müller, W., Todd, J. A., et al.: Eocene  
1443 greenhouse climate revealed by coupled clumped isotope-Mg/Ca thermometry,  
1444 Proceedings of the National Academy of Sciences of the United States of America,  
1445 115(6), 1174-1179. doi:10.1073/pnas.1714744115, 2018.
- 1446 Exon, N. F., Kennett, J. P., and Malone, M.: Proceedings of the Ocean Drilling Program,  
1447 initial reports, volume 189, College Station, Texas: U.S. Government Printing  
1448 Office., 2001.
- 1449 Feng, X., Vonk, J.E., van Dongen, B.E., Gustafsson, Ö., Semiletov, I.P., Dudarev, O.V.,  
1450 Wang, Z., Montluçon, D.B., Wacker, L., Eglinton, T.I.: Differential mobilization of  
1451 terrestrial carbon pools in Eurasian Arctic river basins, PNAS 110 (35) 14168-  
1452 14173; <https://doi.org/10.1073/pnas.1307031110>, 2013.
- 1453 Fensome, R. A., Taylor, F. J. R., Norris, G., Sarjeant, W. A. S., Wharton, D. I., and  
1454 Williams, G. L.: In Dinkins G. (Ed.), A classification of modern and fossil  
1455 dinoflagellates, Salem: Micropalaeontology, Special Paper, 1993.



- 1456 Fisher, R. A., Corbet, A. S., and Williams, C. B.: The relation between the number of  
1457 species and the number of individuals in a random sample of an animal  
1458 population, *Journal of Animal Ecology*, 12(1), 42-58, doi:10.2307/1411, 1943.
- 1459 Foster, G. L., Royer, D. L., and Lunt, D. J.: Future climate forcing potentially without  
1460 precedent in the last 420 million years, *Nature Communications*, 8, 14845, 2017.
- 1461 Frieling, J., Gebhardt, H., Huber, M., Adekeye, O. A., Akande, S. O., Reichart, G.J., et al.:  
1462 Extreme warmth and heat-stressed plankton in the tropics during the Paleocene-  
1463 Eocene Thermal Maximum. *Science Advances*, 3(3) doi:10.1126/sciadv.1600891,  
1464 2017.
- 1465 Frieling, J., Huurdeman, E. P., Rem, C. C. M., Donders, T. H., Pross, J., Bohaty, S. M., et al.:  
1466 Identification of the Paleocene-Eocene boundary in coastal strata in the Otway  
1467 Basin, Victoria, Australia, *Journal of Micropalaeontology*, 37(1), 317-339,  
1468 doi:10.5194/jm-37-317-2018, 2018.
- 1469 Frieling, J., Iakovleva, A. I., Reichart, G. J., Aleksandrova, G. N., Gnibidenko, Z. N.,  
1470 Schouten, S., et al.: Paleocene–Eocene warming and biotic response in the  
1471 epicontinental west Siberian Sea, *Geology*, doi:10.1130/G35724.1, 2014.
- 1472 Frieling, J., and Sluijs, A.: Towards quantitative environmental reconstructions from  
1473 ancient non-analogue microfossil assemblages: Ecological preferences of  
1474 Paleocene – Eocene dinoflagellates, *Earth-Science Reviews*, 185, 956-973,  
1475 doi:10.1016/j.earscirev.2018.08.014, 2018.



- 1476 Fuller, M., and Touchard, Y. On the magnetostratigraphy of the East Tasman Plateau,  
1477 timing of the opening of the Tasmanian Gateway and paleoenvironmental  
1478 changes, In N. Exon, J. P. Kennett and M. Malone (Eds.), *The Cenozoic Southern*  
1479 *Ocean. tectonics, sedimentation and climate change between Australia and*  
1480 *Antarctica* (pp. 127-151), Washington: American Geophysical Union (AGU)  
1481 *Geophysical Monograph series*, 2004.
- 1482 Gibbs, S. J., Bown, P. R., Murphy, B. H., Sluijs, A., Edgar, K. M., Pälike, H., et al.: Scaled  
1483 biotic disruption during early Eocene global warming events, *Biogeosciences*,  
1484 9(11), 4679-4688, 2012.
- 1485 Guasti, E., Speijer, R. P., Brinkhuis, H., Smit, J., and Steurbaut, E.: Paleoenvironmental  
1486 change at the Danian-Selandian transition in Tunisia: Foraminifera, organic-  
1487 walled dinoflagellate cyst and calcareous nannofossil records, *Marine*  
1488 *Micropaleontology*, 59, 210-229, 2006.
- 1489 Hartman, J. D., Bijl, P. K., Sangiorgi, F., Peterse, F., Schouten, S., Salabarnada, A., et al.:  
1490 Paleooceanography and ice sheet variability offshore Wilkes Land, Antarctica –  
1491 part 3: Insights from Oligocene–Miocene TEX<sub>86</sub>-based sea surface temperature  
1492 reconstructions, *Climate of the Past*, 14, 1275–1297, 2018.
- 1493 Hill, P. J., and Exon, N. F.: Tectonics and basin development of the offshore Tasmanian  
1494 area; incorporating results from deep ocean drilling, In N. F. Exon, J. P. Kennett  
1495 and M. Malone (Eds.), *The Cenozoic Southern Ocean; tectonics, sedimentation*  
1496 *and climate change between Australia and Antarctica* (*Geophysical Monograph*



- 1497 Series 151 ed., pp. 19-19), Washington, D.C., U.S.A.: American Geophysical Union,  
1498 2004.
- 1499 Hill, P. J., and Moore, A. M. G.: Geological framework of the South Tasman Rise and  
1500 East Tasman Plateau, *Geoscience Australia*, 2001/40, 2001.
- 1501 Hines, B. R., Hollis, C. J., Atkins, C. B., Baker, J. A., Morgans, H. E. G., and Strong, P. C.:  
1502 Reduction of oceanic temperature gradients in the early Eocene southwest  
1503 Pacific Ocean, *Palaeogeography, Palaeoclimatology, Palaeoecology*, 475, 41-54,  
1504 doi:10.1016/j.palaeo.2017.02.037, 2017.
- 1505 Holdgate, G. R., McGowran, B., Fromhold, T., Wagstaff, B. E., Gallagher, S. J., Wallace, M.  
1506 W., et al.: Eocene-Miocene carbon-isotope and floral record from brown coal  
1507 seams in the Gippsland Basin of southeast Australia, *Global and Planetary  
1508 Change*, 65(1-2), 89-103, doi:10.1016/j.gloplacha.2008.11.001, 2009
- 1509 Hollis, C. J., Crouch, E. M., Morgans, H. E. G., Handley, L., Baker, J. A., Creech, J., et al.:  
1510 Tropical sea temperatures in the high latitude South Pacific during the Eocene,  
1511 *Geology*, 37(2), 99-102, 2009.
- 1512 Hollis, C. J., Dunkley Jones, T., Anagnostou, E., Bijl, P. K., Cramwinckel, M. J., Cui, Y., et  
1513 al.: The DeepMIP contribution to PMIP4: Methodologies for selection,  
1514 compilation and analysis of latest paleocene and early Eocene climate proxy data,  
1515 incorporating version 0.1 of the DeepMIP database, *Geoscientific Model  
1516 Development*, 12(7), 3149-3206, doi:10.5194/gmd-12-3149-2019, 2019



- 1517 Hollis, C. J., Tayler, M. J. S., Andrew, B., Taylor, K. W., Lurcock, P., Bijl, P. K., et al.:
- 1518 Organic-rich sedimentation in the south Pacific Ocean associated with late
- 1519 Paleocene climatic cooling, *Earth-Science Reviews*, 134, 81-97, 2014.
- 1520 Hollis, C. J., Taylor, K. W. R., Handley, L., Pancost, R. D., Huber, M., Creech, J. B., et al.:
- 1521 Early Paleogene temperature history of the southwest Pacific Ocean: Reconciling
- 1522 proxies and models, *Earth and Planetary Science Letters*, 349–350(0), 53-66,
- 1523 doi:10.1016/j.epsl.2012.06.024, 2012
- 1524 Hopmans, E. C., Schouten, S., and Sinninghe Damsté, J. S.: The effect of improved
- 1525 chromatography on GDGT-based palaeoproxies, *Organic Geochemistry*, 93, 1-6,
- 1526 doi:10.1016/j.orggeochem.2015.12.006, 2016.
- 1527 Hopmans, E. C., Weijers, J. W. H., Schefuß, E., Herfort, L., Sinninghe Damsté, J. S., and
- 1528 Schouten, S.: A novel proxy for terrestrial organic matter in sediments based on
- 1529 branched and isoprenoid tetraether lipids, *Earth and Planetary Science Letters*,
- 1530 224, 107-116, 2004.
- 1531 Houben, A. J. P., Bijl, P. K., Sluijs, A., Schouten, S., and Brinkhuis, H.: Late Eocene
- 1532 Southern Ocean cooling and invigoration of circulation preconditioned Antarctica
- 1533 for full-scale glaciation, *Geochemistry, Geophysics, Geosystems*, 20,
- 1534 <https://doi.org/10.1029/2019GC008182>, 2019.
- 1535 Huber, M., Brinkhuis, H., Stickley, C. E., Döös, K., Sluijs, A., Warnaar, J., et al.: Eocene
- 1536 circulation of the Southern Ocean: Was Antarctica kept warm by subtropical
- 1537 waters? *Paleoceanography*, 19, 4026, 2004.



- 1538 Huber, M., and Caballero, R.: The early Eocene equable climate problem revisited,  
1539 Climate of the Past, 7, 603-633, 2011.
- 1540 Huber, M., and Thomas, E., Paleocyanography: The greenhouse world, in Encyclopedia  
1541 of Ocean Sciences, pp 319–329, 2010.
- 1542 Hurley, S. J., Elling, F. J., Kanneke, M., Buchwald, C., Wankel, S. D., Santoro, A. E., Lipp, J.  
1543 S., Hinrichs, K.-U., and Pearson, A.: Influence of ammonia oxidation rate on  
1544 thaumarchaeal lipid composition and the TEX86 temperature proxy, Proceedings  
1545 of the National Academy of Sciences, 113, 7762-7767,  
1546 10.1073/pnas.1518534113, 2016.
- 1547 Hurdeman, E.P., Frieling, J., Reichgelt, T., Bijl, P.K., Bohaty, S.M., Holdgate, G.R.,  
1548 Gallagher, S.J., Peterse, F., Greenwood, D.R., Pross, J.: Rapid expansion of meso-  
1549 megathermal rain forests into the southern high latitudes at the onset of the  
1550 Paleocene-Eocene Thermal Maximum. Geology doi:  
1551 <https://doi.org/10.1130/G47343.1>, 2020.
- 1552 Inglis, G. N., Farnsworth, A., Lunt, D., Foster, G. L., Hollis, C. J., Pagani, M., et al.: Descent  
1553 toward the icehouse: Eocene sea surface cooling inferred from GDGT  
1554 distributions, Paleocyanography, 30(7), 1000-1020,  
1555 doi:10.1002/2014PA002723, 2015.
- 1556 Inglis, G. N., Bragg, F., Burls, N. J., Cramwinckel, M. J., Evans, D., Foster, G. L., Huber, M.,  
1557 Lunt, D. J., Siler, N., Steinig, S., Tierney, J. E., Wilkinson, R., Anagnostou, E., de Boer,  
1558 A. M., Dunkley Jones, T., Edgar, K. M., Hollis, C. J., Hutchinson, D. K., and Pancost, R.  
1559 D.: Global mean surface temperature and climate sensitivity of the early Eocene



- 1560 Climatic Optimum (EECO), Paleocene–Eocene Thermal Maximum (PETM), and  
1561 latest Paleocene, *Clim. Past*, 16, 1953–1968, [https://doi.org/10.5194/cp-16-](https://doi.org/10.5194/cp-16-1953-2020)  
1562 [1953-2020](https://doi.org/10.5194/cp-16-1953-2020), 2020.
- 1563 Kim, J. -, Meer, J. v. d., Schouten, S., Helmke, P., Willmott, V., Sangiorgi, F., et al.: New  
1564 indices and calibrations derived from the distribution of crenarchaeal isoprenoid  
1565 tetraether lipids: Implications for past sea surface temperature reconstructions,  
1566 *Geochimica et Cosmochimica Acta*, 74, 4639-4654, 2010.
- 1567 Kirkels, F. M. S. A., Ponton, C., Galy, V., West, A. J., Feakins, S. J., and Peterse, F.: From  
1568 Andes to Amazon: Assessing Branched Tetraether Lipids as Tracers for Soil  
1569 Organic Carbon in the Madre de Dios River System, *Journal of Geophysical*  
1570 *Research: Biogeosciences*, 125, e2019JG005270, [10.1029/2019jg005270](https://doi.org/10.1029/2019jg005270), 2020.
- 1571 Korasidis, V. A., Wallace, M. W., Dickinson, J. A., and Hoffman, N.: Depositional setting  
1572 for Eocene seat earths and related facies of the Gippsland Basin, Australia,  
1573 *Sedimentary Geology*, doi:10.1016/j.sedgeo.2019.07.007, 2019
- 1574 Kozdon, R., Penman, D. E., Kelly, D. C., Zachos, J. C., Fournelle, J. H., & Valley, J. W.:  
1575 Enhanced poleward flux of atmospheric moisture to the Weddell Sea region (ODP  
1576 Site 690) during the Paleocene-Eocene Thermal Maximum, *Paleoceanography*  
1577 and *Paleoclimatology*, 35, e2019PA003811,  
1578 <https://doi.org/10.1029/2019PA003811> , 2020
- 1579 Lattaud, J., Dorhout, D., Schulz, H., Castañeda, I. S., Schefuß, E., Damsté, J. S. S., et al.:  
1580 The C32 alkane-1,15-diol as a proxy of late Quaternary riverine input in coastal



- 1581 margins, *Climate of the Past*, 13(8), 1049-1061, doi:10.5194/cp-13-1049-2017,  
1582 2017.
- 1583 Lauretano, V., Zachos, J. C., and Lourens, L. J.: Orbitally paced carbon and deep-sea  
1584 temperature changes at the peak of the Early Eocene Climatic Optimum.  
1585 *Paleoceanography and Paleoclimatology*, 33(10), 1050-1065,  
1586 doi:10.1029/2018PA003422, 2018.
- 1587 Leutert, T. J., Auderset, A., Martínez-García, A., Modestou, S., and Meckler, A. N.:  
1588 Southern Ocean temperature evolution coupled to middle Miocene ice sheet  
1589 expansion, *Nature Geoscience* 13, 634-639, 2020.
- 1590 Liu, X., Lipp, J. S., Simpson, J. H., Lin, Y., Summons, R. E., and Hinrichs, K.: Mono- and  
1591 dihydroxyl glycerol dibiphytanyl glycerol tetraethers in marine sediments:  
1592 Identification of both core and intact polar lipid forms. *Geochimica et*  
1593 *Cosmochimica Acta*, 89, 102-115. doi:<https://doi.org/10.1016/j.gca.2012.04.053>,  
1594 2012.
- 1595 Lunt, D. J., Jones, T. D., Heinemann, M., Huber, M., LeGrande, A., Winguth, A., et al.: A  
1596 model-data comparison for a multi-model ensemble of early Eocene atmosphere-  
1597 ocean simulations: EoMIP, *Climate of the Past*, 8(5), 1717-1736, 2012.
- 1598 Lunt, D. J., Bragg, F., Chan, W.-L., Hutchinson, D. K., Ladant, J.-B., Morozova, P.,  
1599 Niezgodzki, I., Steinig, S., Zhang, Z., Zhu, J., Abe-Ouchi, A., Anagnostou, E., de Boer,  
1600 A. M., Coxall, H. K., Donnadieu, Y., Foster, G., Inglis, G. N., Knorr, G., Langebroek, P.  
1601 M., Lear, C. H., Lohmann, G., Poulsen, C. J., Sepulchre, P., Tierney, J. E., Valdes, P. J.,  
1602 Volodin, E. M., Dunkley Jones, T., Hollis, C. J., Huber, M., and Otto-Bliesner, B. L.:





- 1603 DeepMIP: model intercomparison of early Eocene climatic optimum (EECO)  
1604 large-scale climate features and comparison with proxy data, *Clim. Past*, 17, 203–  
1605 227, <https://doi.org/10.5194/cp-17-203-2021>, 2021.
- 1606 Macphail, M. K.: Australian palaeoclimates, cretaceous to tertiary, volume 1: Review  
1607 of palaeobotanical and related evidence up to 2000, Canberra: Geology  
1608 Department, Australian National University, 2000.
- 1609 Macphail, M. K.: ODP Leg 189 initial results: Terrestrial plant microfossils. Canberra:  
1610 Geoscience Australia, 2002
- 1611 Mertens, K. N., Dale, B., Ellegaard, M., Jansson, I. -, Godhe, A., Kremp, A., et al.: Process  
1612 length variation in cysts of the dinoflagellate *protoceratium reticulatum*, from  
1613 surface sediments of the baltic-kattegat-skagerrak estuarine system: A regional  
1614 salinity proxy, *Boreas*, 40(2), 242-255, 2011
- 1615 Moore, D. H., Betts, P. G., and Hall, M.: Towards understanding the early Gondwanan  
1616 margin in southeastern Australia, *Gondwana Research*, 23(4), 1581-1598,  
1617 doi:10.1016/j.gr.2012.08.006, 2013.
- 1618 Müller, R. D., Gaina, C., and Clark, S.: Seafloor spreading around Australia, In J. Veevers  
1619 (Ed.), *Billion-year earth history of Australia and neighbours in gondwanaland*  
1620 (2000) – BYEHA (pp. 1-1) School of Geosciences, University of Sydney, 2000
- 1621 Naafs, B. D. A., Gallego-Sala, A. V., Inglis, G. N., and Pancost, R. D.: Refining the global  
1622 branched glycerol dialkyl glycerol tetraether (brGDGT) soil temperature



- 1623 calibration, *Organic Geochemistry*, 106, 48-56,  
1624 doi:10.1016/j.orggeochem.2017.01.009, 2017.
- 1625 Naafs, B. D. A., Inglis, G. N., Blewett, J., McClymont, E. L., Lauretano, V., Xie, S., et al.: The  
1626 potential of biomarker proxies to trace climate, vegetation, and biogeochemical  
1627 processes in peat: A review, *Global and Planetary Change*, 179, 57-79,  
1628 doi:10.1016/j.gloplacha.2019.05.006, 2019.
- 1629 Naafs, B. D. A., Inglis, G. N., Zheng, Y., Amesbury, M. J., Biester, H., Bindler, R., et al.:  
1630 Introducing global peat-specific temperature and pH calibrations based on  
1631 brGDGT bacterial lipids, *Geochimica et Cosmochimica Acta*, 208, 285-301,  
1632 doi:10.1016/j.gca.2017.01.038, 2017.
- 1633 Naafs, B. D. A., McCormick, D., Inglis, G. N., and Pancost, R. D.: Archaeal and bacterial  
1634 H-GDGTs are abundant in peat and their relative abundance is positively  
1635 correlated with temperature, *Geochimica Et Cosmochimica Acta*, 227, 156-170,  
1636 doi:10.1016/j.gca.2018.02.025, 2018.
- 1637 Naafs, B. D. A., Rohrssen, M., Inglis, G. N., Lähteenoja, O., Feakins, S. J., Collinson, M. E.,  
1638 et al.: High temperatures in the terrestrial mid-latitudes during the early  
1639 Palaeogene, *Nature Geoscience*, 11(10), 766-771, doi:10.1038/s41561-018-  
1640 0199-0, 2018.
- 1641 O'Brien, C. L., Robinson, S. A., Pancost, R. D., Sinninghe Damsté, J. S., Schouten, S., Lunt,  
1642 D. J., et al.: Cretaceous sea-surface temperature evolution: Constraints from TEX<sub>86</sub>  
1643 and planktonic foraminiferal oxygen isotopes, *Earth-Science Reviews*, 172, 224-  
1644 247, doi:10.1016/j.earscirev.2017.07.012, 2017.



- 1645 O'Brien, C. L., Huber, M., Thomas, E., Pagani, M., Super, J. R., Elder, L. E., et al.: The  
1646 enigma of Oligocene climate and global surface temperature evolution,  
1647 Proceedings of the National Academy of Sciences, 202003914,  
1648 doi:10.1073/pnas.2003914117, 2020.
- 1649 O'Connor, L. K., Robinson, S. A., Naafs, B. D. A., Jenkyns, H. C., Henson, S., Clarke, M., et  
1650 al.: Late Cretaceous temperature evolution of the southern high latitudes: A  
1651 TEX<sub>86</sub> perspective, *Paleoceanography and Paleoclimatology*, 34(4), 436-454,  
1652 doi:10.1029/2018PA003546, 2019.
- 1653 Oksanen, J., Blanchet, F. G., Friendly, M., Kindt, R., Legendre, P., McGlinn, D., et al.:  
1654 *Vegan: Community ecology package*, 2015.
- 1655 Pancost, R. D., Taylor, K. W. R., Inglis, G. N., Kennedy, E. M., Handley, L., Hollis, C. J., et  
1656 al.: Early Paleogene evolution of terrestrial climate in the SW Pacific, southern  
1657 New Zealand, *Geochemistry, Geophysics, Geosystems*, 14(12), 5413-5429, 2013.
- 1658 Passchier, S., Bohaty, S. M., Jiménez-Espejo, F., Pross, J., Röhl, U., Van De Flierdt, T., et  
1659 al.: Early Eocene to middle Miocene cooling and aridification of east Antarctica,  
1660 *Geochemistry, Geophysics, Geosystems*, 14(5), 1399-1410, 2013
- 1661 Passchier, S., Ciarletta, D. J., Miriagos, T. E., Bijl, P. K., and Bohaty, S. M.: An Antarctic  
1662 stratigraphic record of stepwise ice growth through the Eocene-Oligocene  
1663 transition, *Bulletin of the Geological Society of America*, 129(3-4), 318-330,  
1664 doi:10.1130/B31482.1, 2017.



- 1665 Peterse, F., Kim, J. -, Schouten, S., Kristensen, D. K., Koç, N., and Sinninghe Damsté, J. S.:  
1666 Constraints on the application of the MBT-CBT paleothermometer at high  
1667 latitude environments (Svalbard, Norway), *Organic Geochemistry*, 40, 692-699,  
1668 2009.
- 1669 Peterse, F., Meer, J. v. d., Schouten, S., Weijers, J. W. H., Fierer, N., Jackson, R. B., et al.:  
1670 Revised calibration of the MBT-CBT paleotemperature proxy based on branched  
1671 tetraether membrane lipids in surface soils. *Geochimica Et Cosmochimica Acta*,  
1672 2012.
- 1673 Pross, J., & Brinkhuis, H., Organic-walled dinoflagellate cysts as paleoenvironmental  
1674 indicators in the paleogene; a synopsis of concepts, *Palaeontologische Zeitschrift*,  
1675 Band 79, 53-59, 2005.
- 1676 Pross, J., Contreras, L., Bijl, P. K., Greenwood, D. R., Bohaty, S. M., Schouten, S., et al.:  
1677 Persistent near-tropical warmth on the Antarctic continent during the early  
1678 Eocene epoch, *Nature*, 488, 73-73, 2012.
- 1679 Qin, W., Carlson, L. T., Armbrust, E. V., Devol, A. H., Moffett, J. W., Stahl, D. A., and  
1680 Ingalls, A. E.: Confounding effects of oxygen and temperature on the TEX<sub>86</sub>  
1681 signature of marine Thaumarchaeota, *Proceedings of the National Academy of*  
1682 *Sciences*, 112, 10979-10984, 10.1073/pnas.1501568112, 2015.
- 1683 Reichgelt, T., West, C.K., Greenwood, D.R.: The relation between global palm  
1684 distribution and climate, *Scientific Reports* 8(1), DOI: 10.1038/s41598-018-  
1685 23147-2, 2018.



- 1686 Robert, C.: Cenozoic environments in the Tasmanian area of the Southern Ocean (ODP  
1687 Leg 189): Inferences from bulk and clay mineralogy, Geophysical Monograph  
1688 Series, 151, 127-151, 2004.
- 1689 Rochon, A., Lewis, J., Ellegaard, M., and Harding, I. C.: The gonyaulax spinifera  
1690 (dinophyceae) “complex”: Perpetuating the paradox? Review of Palaeobotany  
1691 and Palynology, 155(1), 52-60,  
1692 doi:<https://doi.org/10.1016/j.revpalbo.2008.12.017>, 2008.
- 1693 Röhl, U., Brinkhuis, H., Stickley, C. E., Fuller, M., Schellenberg, S. A., Wefer, G., et al.: Sea  
1694 level and astronomically induced environmental changes in middle and late  
1695 Eocene sediments from the East Tasman Plateau. Geophysical Monograph Series,  
1696 151, 127-151, 2004a.
- 1697 Röhl, U., Brinkhuis, H., Sluijs, A., and Fuller, M.: On the search for the  
1698 Paleocene/eocene boundary in the Southern Ocean: Exploring ODP Leg 189  
1699 Holes 1171D and 1172D, Tasman Sea, Geophysical Monograph Series, 151, 113-  
1700 124, 2004b.
- 1701 Röhl, U., Westerhold, T., Bralower, T. J., and Zachos, J. C.: On the duration of the  
1702 Paleocene-Eocene Thermal Maximum (PETM), Geochemistry, Geophysics,  
1703 Geosystems, 8, Q12002, 2007.
- 1704 Salamy, K.A., Zachos, J.C.: Latest Eocene-Early Oligocene climate change and Southern  
1705 Ocean fertility: Inferences from sediment accumulation and stable isotope data,  
1706 Palaeogeogr., Palaeoclimatol., Palaeoecol. 145, 61–77, 1999.



- 1707 Schefuß, E., Eglinton, T., Spencer-Jones, C. et al.: Hydrologic control of carbon cycling  
1708 and aged carbon discharge in the Congo River basin, *Nature Geosciences* 9, 687–  
1709 690, 2016.
- 1710 Schellenberg, S. A., Brinkhuis, H., Stickley, C. E., Fuller, M., Kyte, F. T., and Williams, G.  
1711 L.: The Cretaceous/Paleogene transition on the East Tasman Plateau,  
1712 southwestern Pacific, In N. Exon, J. P. Kennett and M. Malone (Eds.), *The Cenozoic*  
1713 *Southern Ocean; tectonics, sedimentation and climate change between Australia*  
1714 *and Antarctica* (pp. 93-112), Washington: Geophysical Monograph Series, 2004.
- 1715 Schouten, S., Hopmans, E. C., Schefuß, E., and Sinninghe Damsté, J. S.: Distributional  
1716 variations in marine crenarchaeotal membrane lipids: A new tool for  
1717 reconstructing ancient sea water temperatures? *Earth and Planetary Science*  
1718 *Letters*, 204, 265-274, 2002.
- 1719 Schouten, S., Hopmans, E. C., and Sinninghe Damsté, J. S., The organic geochemistry of  
1720 glycerol dialkyl glycerol tetraether lipids: A review, *Organic Geochemistry*, 54,  
1721 19-61, doi:10.1016/j.orggeochem.2012.09.006, 2013.
- 1722 Seton, M., Müller, R. D., Zahirovic, S., Gaina, C., Torsvik, T., Shephard, G., et al.: Global  
1723 continental and ocean basin reconstructions since 200 Ma, *Earth-Science*  
1724 *Reviews*, 113(3-4), 212-270, 2012.
- 1725 Shannon, C. E.: A mathematical theory of communication, *Bell System Technical*  
1726 *Journal*, 27(3), 379-423, doi:10.1002/j.1538-7305.1948.tb01338.x, 1948.



- 1727 Sijp, W. P., Von Der Heydt, A S, and Bijl, P. K.: Model simulations of early westward  
1728 flow across the Tasman Gateway during the early Eocene, *Climate of the Past*,  
1729 12(4), 807-817, doi:10.5194/cp-12-807-2016, 2016.
- 1730 Sijp, W. P., von der Heydt, A S, Dijkstra, H. A., Flögel, S., Douglas, P. M. J., and Bijl, P. K.:  
1731 The role of ocean gateways on cooling climate on long time scales, *Global and*  
1732 *Planetary Change*, 119, 1-22, doi:10.1016/j.gloplacha.2014.04.004, 2014.
- 1733 Simpson, E.: Measurement of diversity. *Nature*, 163, 688, 1949.
- 1734 Sinninghe Damsté, J. S.: Spatial heterogeneity of sources of branched tetraethers in  
1735 shelf systems: The geochemistry of tetraethers in the Berau River delta  
1736 (Kalimantan, Indonesia), *Geochimica et Cosmochimica Acta*, 186, 13-31,  
1737 doi:10.1016/j.gca.2016.04.033, 2016.
- 1738 Sluijs, A., Schouten, S., Pagani, M., Woltering, M., Brinkhuis, H., Sinninghe Damsté, J. S.,  
1739 et al.: Subtropical Arctic Ocean temperatures during the Palaeocene/Eocene  
1740 Thermal Maximum, *Nature*, 441, 610-613, 2006.
- 1741 Sluijs, A., Bijl, P. K., Schouten, S., Röhl, U., Reichert, G.J., and Brinkhuis, H.: Southern  
1742 Ocean warming and hydrological change during the Paleocene-Eocene Thermal  
1743 Maximum, *Climate of the Past*, 7, 47-61, 2011.
- 1744 Sluijs, A., and Brinkhuis, H.: A dynamic climate and ecosystem state during the  
1745 Paleocene-Eocene Thermal Maximum: Inferences from dinoflagellate cyst  
1746 assemblages on the New Jersey Shelf, *Biogeosciences*, 6(8), 1755-1781, 2009.



- 1747 Sluijs, A., Brinkhuis, H., Stickley, C. E., Warnaar, J., Williams, G. L., and Fuller, M.:  
1748 Dinoflagellate cysts from the Eocene - Oligocene transition in the Southern  
1749 Ocean: Results from ODP Leg 189, In N. Exon, and J. P. Kennett (Eds.),  
1750 Proceedings of the Ocean Drilling Program, scientific results, volume 189,  
1751 College Station, Texas: U.S. Government Printing Office, 2003.
- 1752 Sluijs, A., Frieling, J., Inglis, G. N., Nierop, K. G. J., Peterse, F., Sangiorgi, F., et al.: Late  
1753 Paleocene – early Eocene Arctic Ocean sea surface temperatures; reassessing  
1754 biomarker paleothermometry at lomonosov ridge, *Clim. Past Discuss.*,  
1755 doi:rg/10.5194/cp-2020-13, 2020.
- 1756 Sluijs, A., Pross, J., and Brinkhuis, H.: From greenhouse to icehouse; organic walled  
1757 dinoflagellate cysts as paleoenvironmental indicators in the Paleogene, *Earth-*  
1758 *Science Reviews*, 68, 281-315, 2005.
- 1759 Sluijs, A., van Roij, L., Harrington, G. J., Schouten, S., Sessa, J. A., LeVay, L. J., et al.:  
1760 Warming, euxinia and sea level rise during the Paleocene–Eocene Thermal  
1761 Maximum on the Gulf Coastal plain: Implications for ocean oxygenation and  
1762 nutrient cycling, *Climate of the Past*, 10(4), 1421-1439, doi:10.5194/cp-10-1421-  
1763 2014, 2014.
- 1764 Somme, T. O., Helland-Hansen, W., and Granjeon, D., Impact of eustatic amplitude  
1765 variations on shelf morphology, sediment dispersal, and sequence stratigraphic  
1766 interpretation: Icehouse versus greenhouse systems, *Geology*, 37(7), 587-590,  
1767 2009.





- 1768 Staub, J.R., Cohen, A.D.: Kaolinite-enrichment Beneath Coals; A Modern Analog,  
1769 Snuggedy Swamp, South Carolina, SEPM J Sediment Res Vol. 48(1):203–210,  
1770 1978.
- 1771 Stickley, C. E., Brinkhuis, H., McGonigal, K. L., Chapronière, G. C. H., Fuller, M., Kelly, D.  
1772 C., et al.: Late Cretaceous - Quaternary biomagnetostratigraphy of ODP Site 1168,  
1773 1170, 1171 and 1172, Tasmanian Gateway, In N. F. Exon, J. P. Kennett and M. J.  
1774 Malone (Eds.), Proceedings of the Ocean Drilling Program, scientific results,  
1775 volume 189, 2004a.
- 1776 Stickley, C. E., Brinkhuis, H., Schellenberg, S. A., Sluijs, A., Röhl, U., Fuller, M., et al.:  
1777 Timing and nature of the deepening of the Tasmanian Gateway,  
1778 Paleoclimatology, 19, 4027, 2004b.
- 1779 Tang, X., Naafs, B. D., Pancost, R. D., Liu, Z., Fan, T., & Zheng, Y.: Exploring the  
1780 influences of temperature on “H-shaped” glycerol dialkyl glycerol tetraethers in a  
1781 stratigraphic context: Evidence from two peat cores across the late Quaternary,  
1782 Frontiers in Earth Science, 8, 477, 2021.
- 1783 Taylor, K. W. R., Huber, M., Hollis, C. J., Hernandez-Sanchez, M. T., and Pancost, R. D.:  
1784 Re-evaluating modern and Palaeogene GDGT distributions: Implications for SST  
1785 reconstructions, Global and Planetary Change, 108, 158-174, 2013.
- 1786 Thomas, D. J., Bralower, T. J., and Jones, C. E.: Neodymium isotopic reconstruction of  
1787 the late Paleocene - early Eocene thermohaline circulation, Earth and Planetary  
1788 Science Letters, 209(3-4), 309-322, 2003.



- 1789 Thomas, D. J., Korty, R., Huber, M., Schubert, J. A., and Haines, B.: Nd isotopic structure  
1790 of the Pacific Ocean 70–30 Ma and numerical evidence for vigorous ocean  
1791 circulation and ocean heat transport in a greenhouse world, *Paleoceanography*,  
1792 PA2535, 2014.
- 1793 Tierney, J. E., and Russell, J. M.: Distributions of branched GDGTs in a tropical lake  
1794 system: Implications for lacustrine application of the MBT/CBT paleoproxy,  
1795 doi:10.1016/j.orggeochem.2009.04.014, 2009.
- 1796 Tierney, J. E., Sinninghe Damsté, J. S., Pancost, R. D., Sluijs, A., and Zachos, J. C.: Eocene  
1797 temperature gradients, *Nature Geoscience*, 10(8), 538-539,  
1798 doi:10.1038/ngeo2997, 2017.
- 1799 Tierney, J. E., and Tingley, M. P.: A TEX<sub>86</sub> surface sediment database and extended  
1800 bayesian calibration, *Scientific Data*, 2 doi:10.1038/sdata.2015.29, 2015.
- 1801 Tierney, J. E., & Tingley, M. P.: BAYSPLINE: A new calibration for the alkenone  
1802 paleothermometer, *Paleoceanography and Paleoclimatology*, 33(3), 281-301,  
1803 doi:10.1002/2017PA003201, 2018.
- 1804 Torsvik, T. H., Van der Voo, R., Preeden, U., Niocaill, C. M., Steinberger, B., Doubrovine,  
1805 P. V., et al.: Phanerozoic polar wander, palaeogeography and dynamics, *Earth-*  
1806 *Science Reviews*, 114(3-4), 325-368, 2012.
- 1807 Truswell, E. M.: Palynomorph assemblages from marine Eocene sediments on the  
1808 west Tasmanian continental margin and the South Tasman Rise. *Australian*  
1809 *Journal of Earth Sciences*, 44, 633-654, 1997.



1810 Van Dijk, J., Fernandez, A., Bernasconi, S.M., Caves Rügenstein, J.K., Passey, S.R., White,  
1811 T.: Spatial pattern of super-greenhouse warmth controlled by elevated specific  
1812 humidity, *Nature Geoscience*, 13 (11), pp. 739-744, 2020.

1813 Van Hinsbergen, D. J. J., De Groot, L. V., Van Schaik, S. J., Spakman, W., Bijl, P. K., Sluijs,  
1814 A., et al.: A paleolatitude calculator for paleoclimate studies, *PLoS ONE*, 10(6),  
1815 2015.

1816 Warden, L., Kim, J. -, Zell, C., Vis, G. -, De Stigter, H., Bonnin, J., et al.: Examining the  
1817 provenance of branched GDGTs in the tagus river drainage basin and its outflow  
1818 into the Atlantic Ocean over the holocene to determine their usefulness for  
1819 paleoclimate applications, *Biogeosciences*, 13(20), 5719-5738, doi:10.5194/bg-  
1820 13-5719-2016, 2016.

1821 Warden, L., Moros, M., Weber, Y., and Sinninghe Damsté, J. S.: Change in provenance of  
1822 branched glycerol dialkyl glycerol tetraethers over the Holocene in the Baltic Sea  
1823 and its impact on continental climate reconstruction, *Organic Geochemistry*, 121,  
1824 138-154, doi:10.1016/j.orggeochem.2018.03.007, 2018.

1825 Warnaar, J., Bijl, P. K., Huber, M., Sloan, L. C., Brinkhuis, H., Röhl, U., et al.: Orbitally  
1826 forced climate changes in the Tasman sector during the middle Eocene,  
1827 *Palaeogeography, Palaeoclimatology, Palaeoecology*, 280, 361-370, 2009.

1828 Weijers, J. W. H., Lim, K. L. H., Aquilina, A., Damsté, J. S. S., and Pancost, R. D.:  
1829 Biogeochemical controls on glycerol dialkyl glycerol tetraether lipid distributions  
1830 in sediments characterized by diffusive methane flux, *Geochemistry, Geophysics,*  
1831 *Geosystems*, 12(10), doi:10.1029/2011GC003724, 2011.



- 1832 Weijers, J. W. H., Schouten, S., Spaargaren, O. C., and Sinninghe Damste, J. S.:  
1833 Occurrence and distribution of tetraether membrane lipids in soils: Implications  
1834 for the use of the TEX<sub>86</sub> proxy and the BIT index, *Organic Geochemistry*, 37,  
1835 1680-1693, 2006.
- 1836 Weijers, J. W. H., Schouten, S., van den Donker, J C, Hopmans, E. C., and Sinninghe  
1837 Damsté, J. S.: Environmental controls on bacterial tetraether membrane lipid  
1838 distribution in soils, *Geochimica Et Cosmochimica Acta*, 71, 703-713, 2007.
- 1839 Westerhold, T., Marwan, N., Drury, A. J., Liebrand, D., Agnini, C., Anagnostou, E., et al.:  
1840 An astronomically dated record of earth's climate and its predictability over the  
1841 last 66 million years. *Science*, 369(6509), 1383-1387,  
1842 doi:10.1126/science.aba6853, 2020.
- 1843 Willard, D. A., Donders, T. H., Reichgelt, T., Greenwood, D. R., Sangiorgi, F., Peterse, F.,  
1844 et al.: Arctic vegetation, temperature, and hydrology during early Eocene  
1845 transient global warming events, *Global and Planetary Change*, 178, 139-152,  
1846 doi:10.1016/j.gloplacha.2019.04.012, 2019.
- 1847 Williams, G. L., Fensome, R. A., and MacRae, R. A.: *Dinoflaj3*, American Association of  
1848 Stratigraphic Palynologists, Data Series, 2, 2017.
- 1849 Williams, S. E., Whittaker, J. M., Halpin, J. A., and Müller, R. D.: Australian-Antarctic  
1850 breakup and seafloor spreading: Balancing geological and geophysical  
1851 constraints, *Earth-Science Reviews*, 188, 41-58,  
1852 doi:10.1016/j.earscirev.2018.10.011, 2019

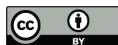

- 1853 Xie, S., Liu, X., Schubotz, F., Wakeham, S. G., & Hinrichs, K.: Distribution of glycerol  
1854 ether lipids in the oxygen minimum zone of the eastern tropical north pacific  
1855 ocean, *Organic Geochemistry*, 71, 60-71,  
1856 doi:<https://doi.org/10.1016/j.orggeochem.2014.04.006>, 2014.
- 1857 Zachos, J. C., Schouten, S., Bohaty, S., Quattlebaum, T., Sluijs, A., Brinkhuis, H., et al.:  
1858 Extreme warming of mid-latitude coastal ocean during the Paleocene-Eocene  
1859 Thermal Maximum: Inferences from TEX and isotope data, *Geology*, 34(9), 737-  
1860 740, 2006.
- 1861 Zeebe, R.E., Lourens, L.J.: Solar System chaos and the Paleocene–Eocene boundary age  
1862 constrained by geology and astronomy, *Science*, 365 (6456), pp. 926-929, 2019.
- 1863 Zell, C., Kim, J. -, Dorhout, D., Baas, M., and Sinninghe Damsté, J. S.: Sources and  
1864 distributions of branched tetraether lipids and crenarchaeol along the  
1865 Portuguese continental margin: Implications for the BIT index, *Continental Shelf  
1866 Research*, 96, 34-44, doi:10.1016/j.csr.2015.01.006, 2015.
- 1867 Zell, C., Kim, J. -, Hollander, D., Lorenzoni, L., Baker, P., Silva, C. G., et al.: Sources and  
1868 distributions of branched and isoprenoid tetraether lipids on the Amazon shelf  
1869 and fan: Implications for the use of GDGT-based proxies in marine sediments,  
1870 *Geochimica et Cosmochimica Acta*, 139, 293-312, doi:10.1016/j.gca.2014.04.038,  
1871 2014.
- 1872 Zell, C., Kim, J. -, Moreira-Turcq, P., Abril, G., Hopmans, E. C., Bonnet, M. -, et al.:  
1873 Disentangling the origins of branched tetraether lipids and crenarchaeol in the

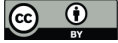

- 1874 lower Amazon River: Implications for GDGT-based proxies, *Limnology and*  
1875 *Oceanography*, 58(1), 343-353, doi:10.4319/lo.2013.58.1.0343, 2013
- 1876 Zhang, Y. G., Pagani, M., and Wang, Z.: Ring index: A new strategy to evaluate the  
1877 integrity of TEX<sub>86</sub> paleothermometry, *Paleoceanography*, 31(2), 220-232,  
1878 doi:10.1002/2015PA002848, 2016.
- 1879 Zhang, Y. G., Zhang, C. L., Liu, X. -, Li, L., Hinrichs, K. -, and Noakes, J. E.: Methane  
1880 index: A tetraether archaeal lipid biomarker indicator for detecting the instability  
1881 of marine gas hydrates, *Earth and Planetary Science Letters*, 307(3-4), 525-534,  
1882 doi:10.1016/j.epsl.2011.05.031, 2011.
- 1883
- 1884
